# Supplementary material for: A novel N-doped carbon nanomaterial – carbon nano-mousse
Source: Royal Society of Chemistry journal article supplement (doi:10.1039/d2ta07947j), 2023-01-01
Supplement: d2ta07947j1.pdf [file d2ta07947j1.pdf]

Supporting information

Contents

|                                                        |    |
|--------------------------------------------------------|----|
| 1. CVD apparatus.....                                  | 2  |
| 2. Deconvoluted Raman spectra of gained materials..... | 3  |
| 3. XPS spectra .....                                   | 9  |
| 4. AFM images .....                                    | 25 |
| 5. STEM images .....                                   | 27 |
| 6. HR-TEM proceedings .....                            | 31 |

## 1. CVD apparatus

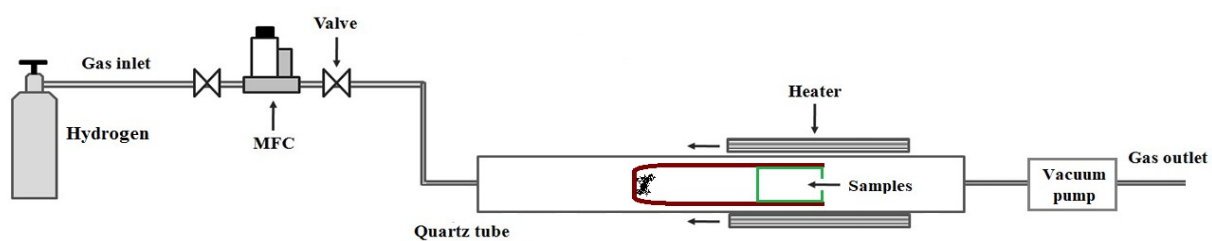

**Figure S1** Scheme of CVD apparatus.

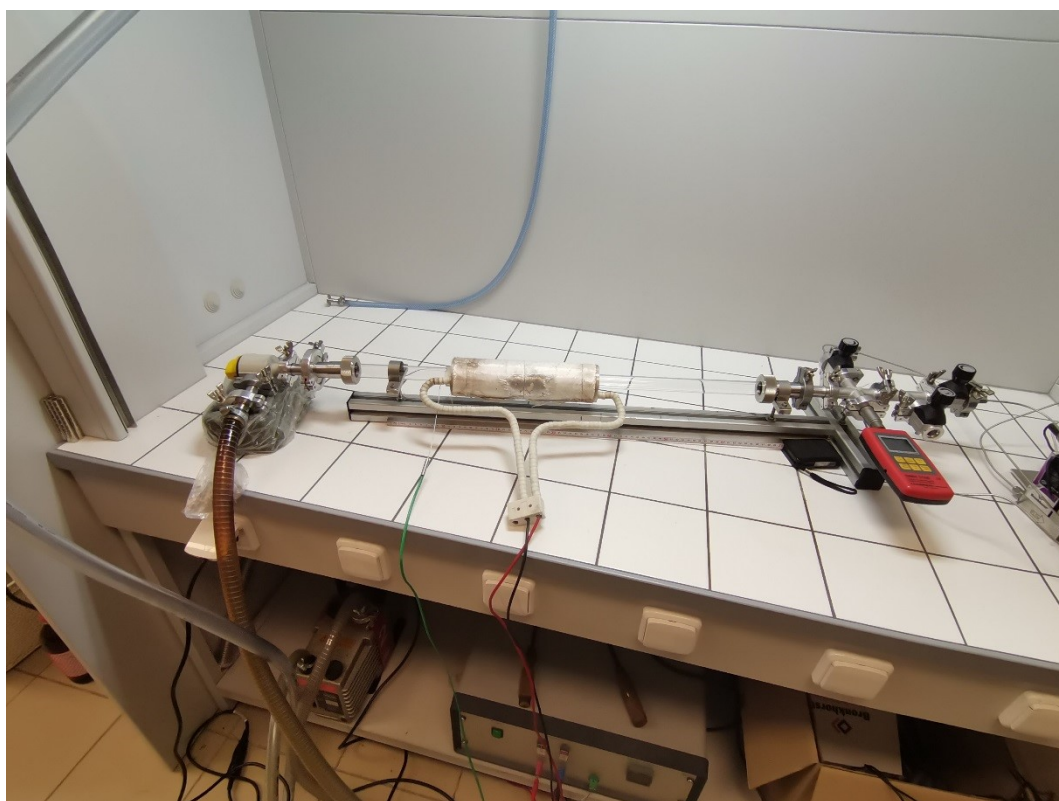

**Figure S2** CVD apparatus with external heating used in the experiments.

## 2. Deconvoluted Raman spectra of gained materials

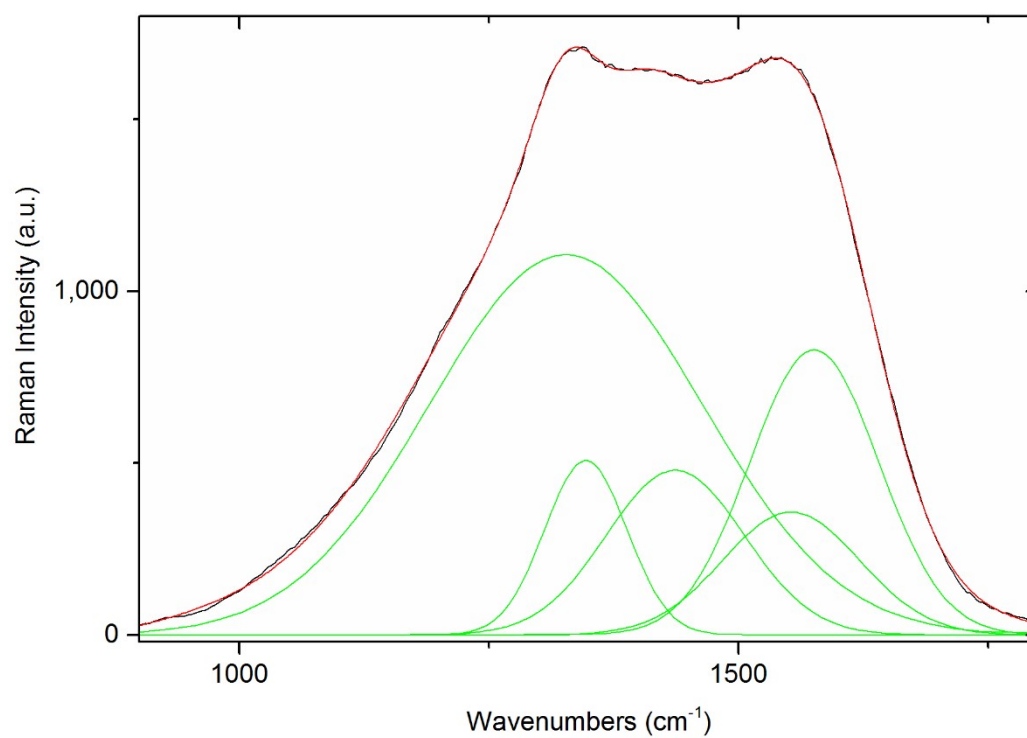

**Figure S3** Deconvoluted part of Raman spectrum of **1-1050**.

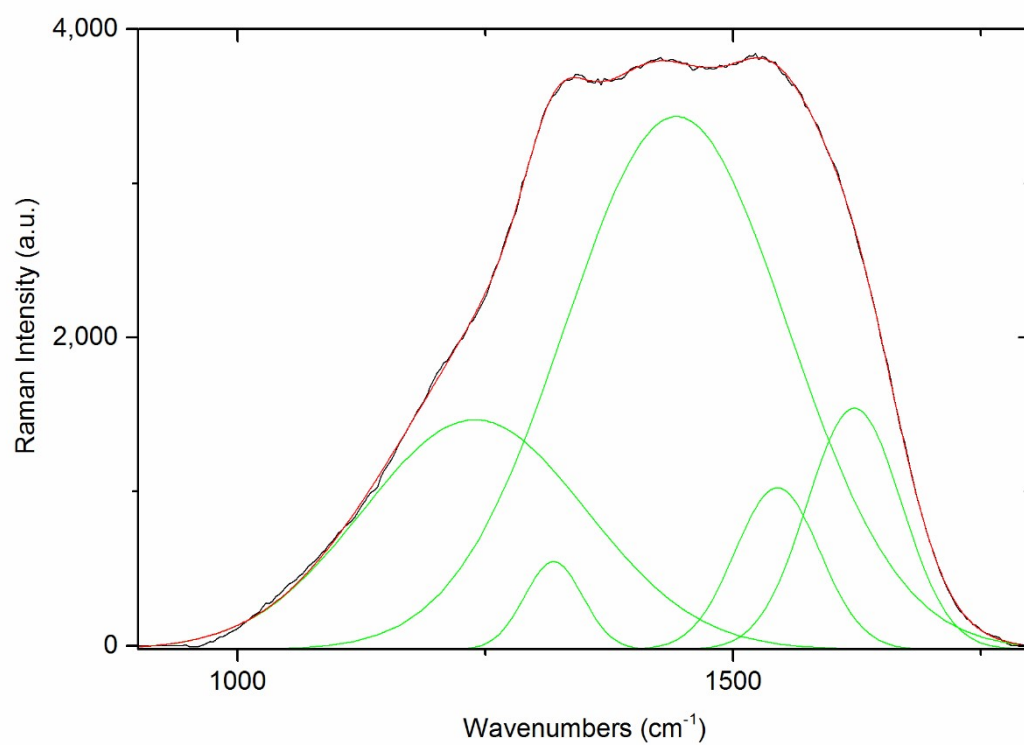

**Figure S4** Deconvoluted part of Raman spectrum of **1-900**.

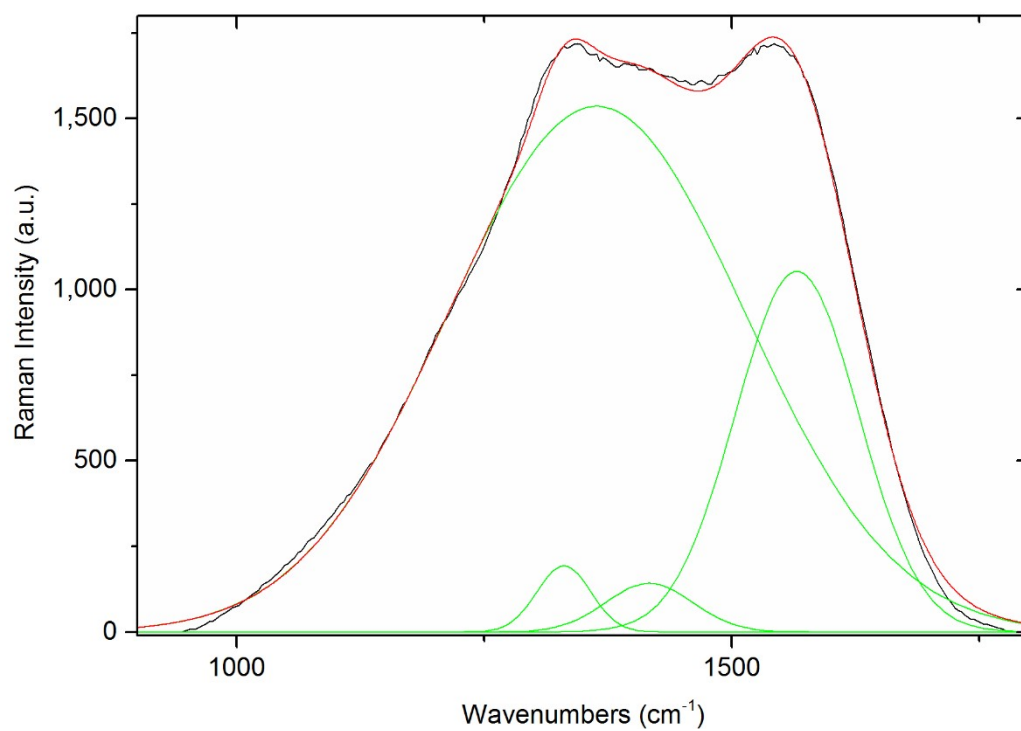

**Figure S5** Deconvoluted part of Raman spectrum of **2-1050**.

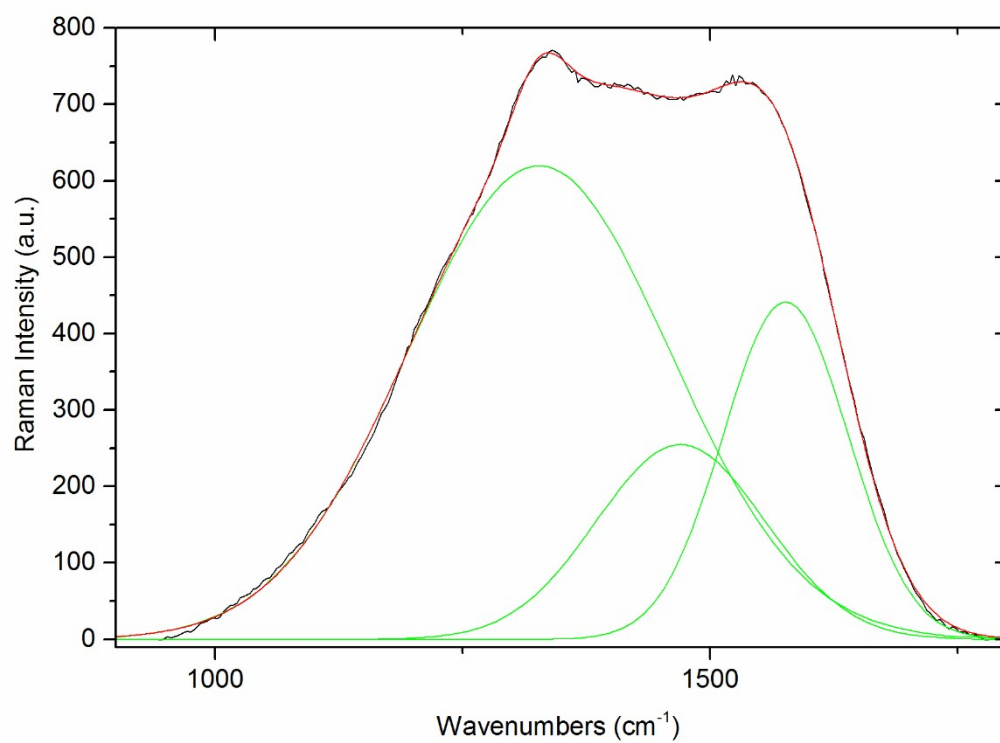

**Figure S6** Deconvoluted part of Raman spectrum of **2-900**.

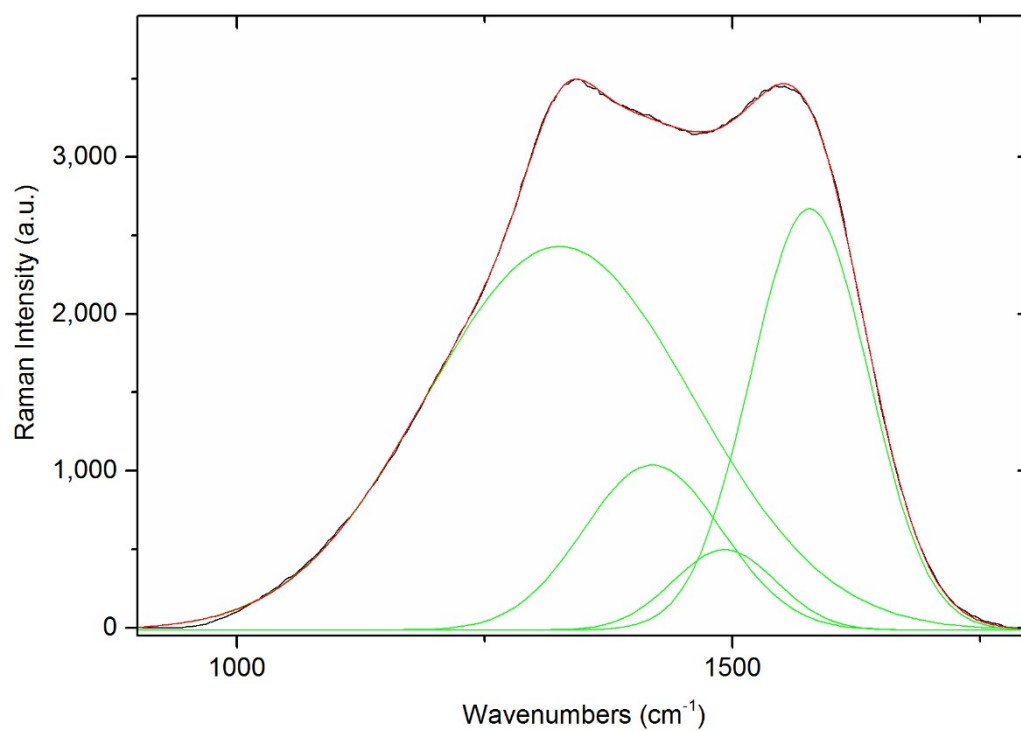

**Figure S7** Deconvoluted part of Raman spectrum of **2-750**.

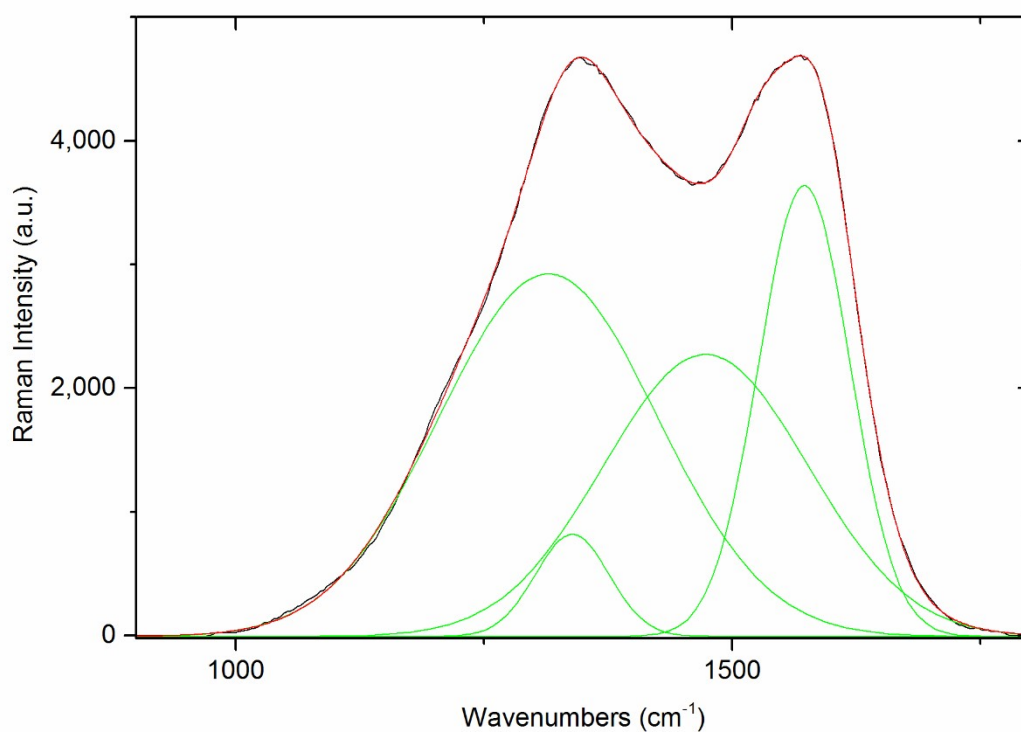

**Figure S8** Deconvoluted part of Raman spectrum of **2-600**.

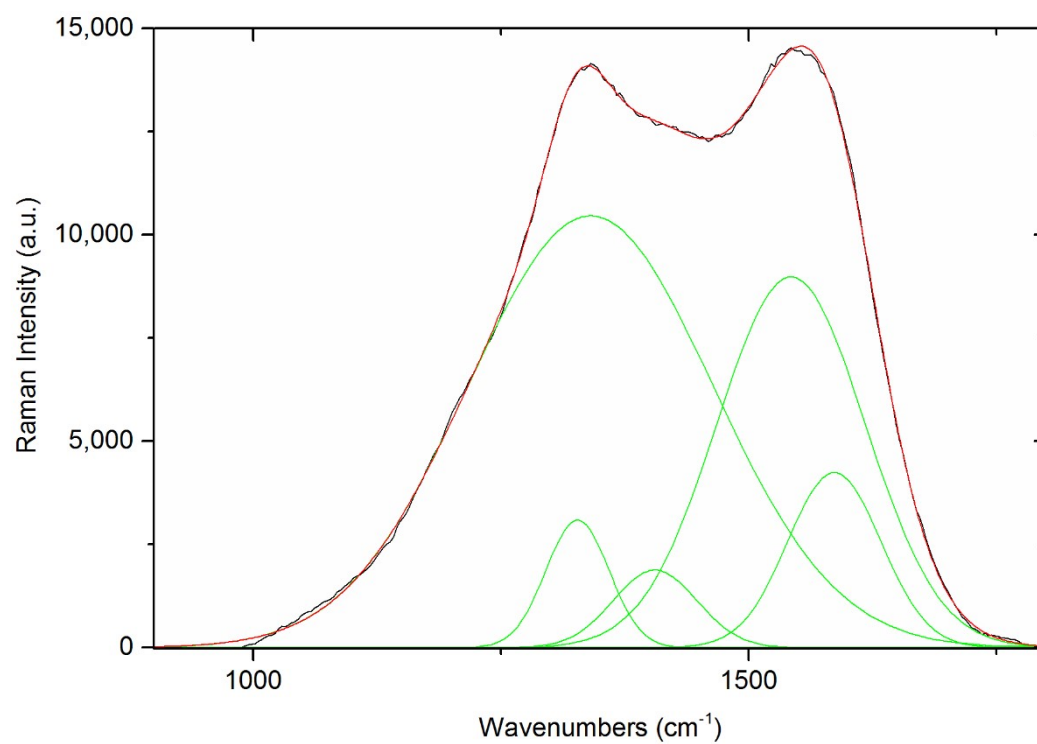

**Figure S9** Deconvoluted part of Raman spectrum of **2-500**.

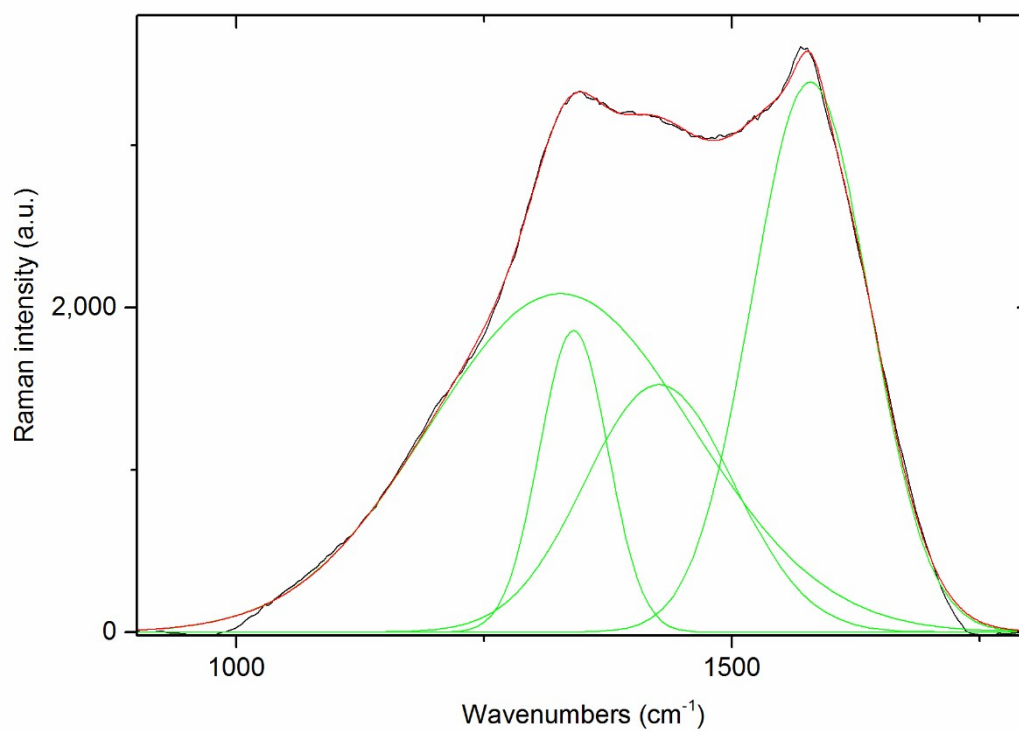

**Figure S10** Deconvoluted part of Raman spectrum of **3-1050**.

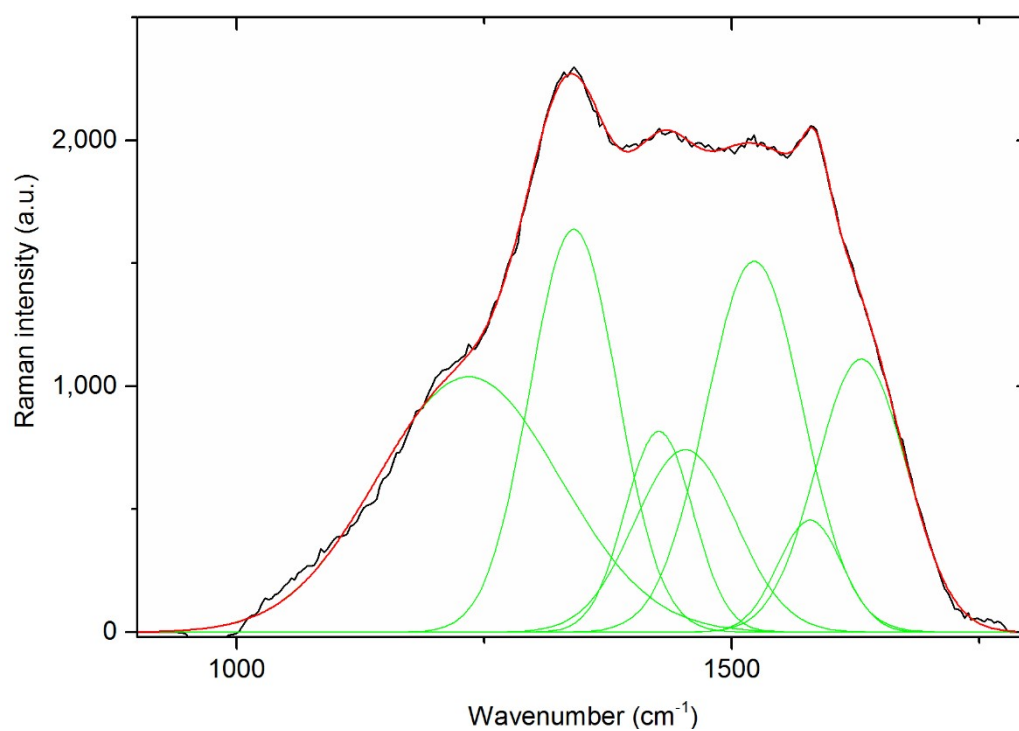

**Figure S11** Deconvoluted part of Raman spectrum of **3-900**.

### 3. XPS spectra

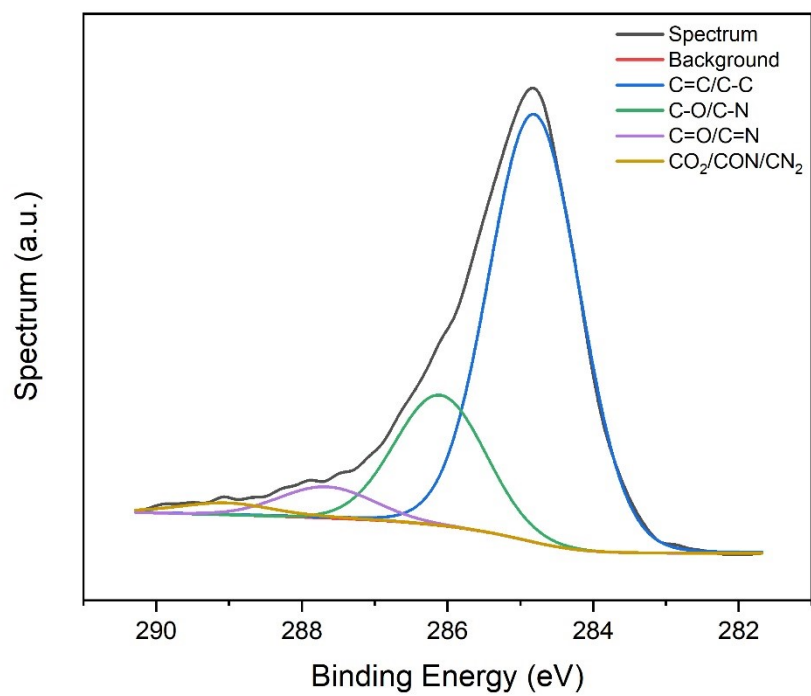

**Figure S12** C 1s region of XPS spectrum of **1-1050**.

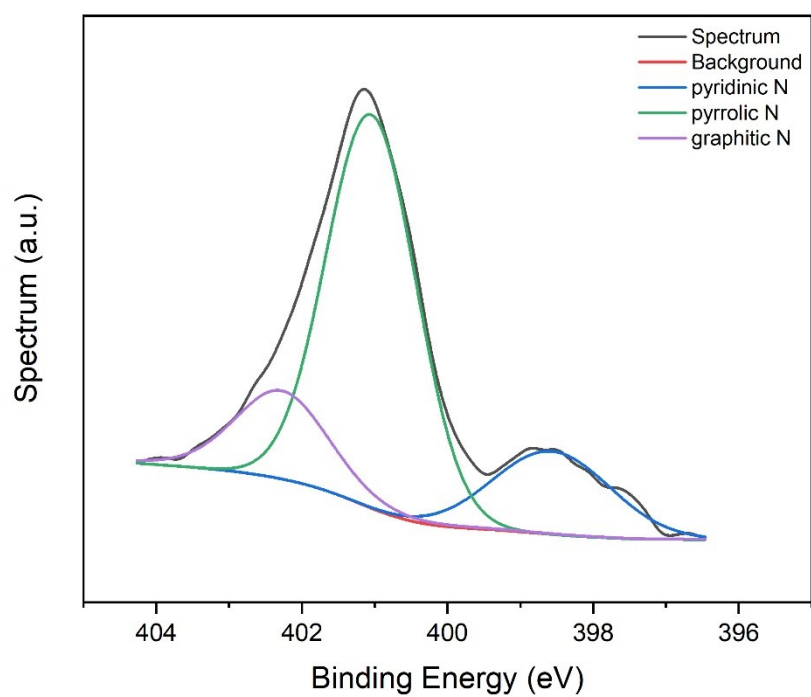

**Figure S13** N 1s region XPS spectrum of **1-1050**.

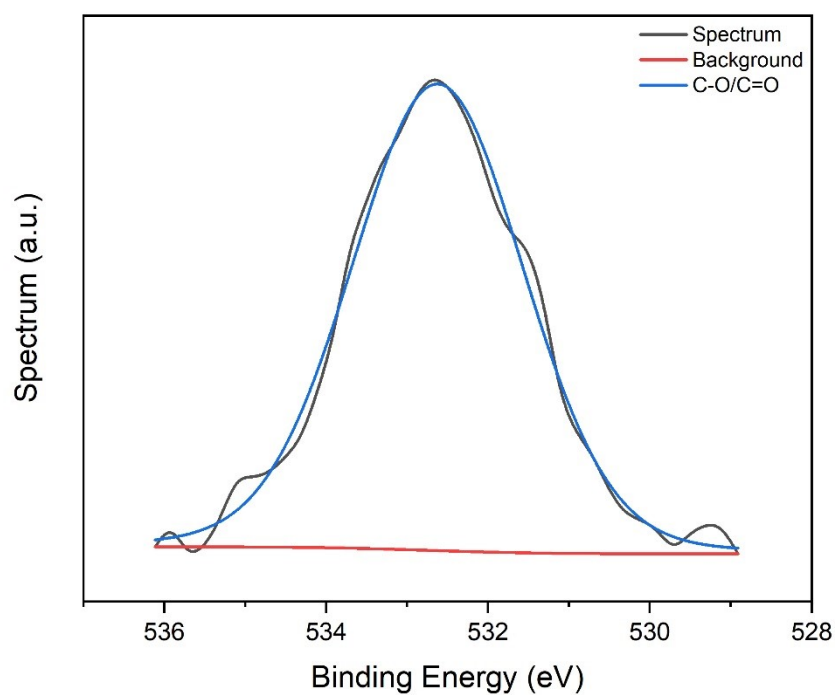

**Figure S14** O 1s region of XPS spectrum of **1-1050**.

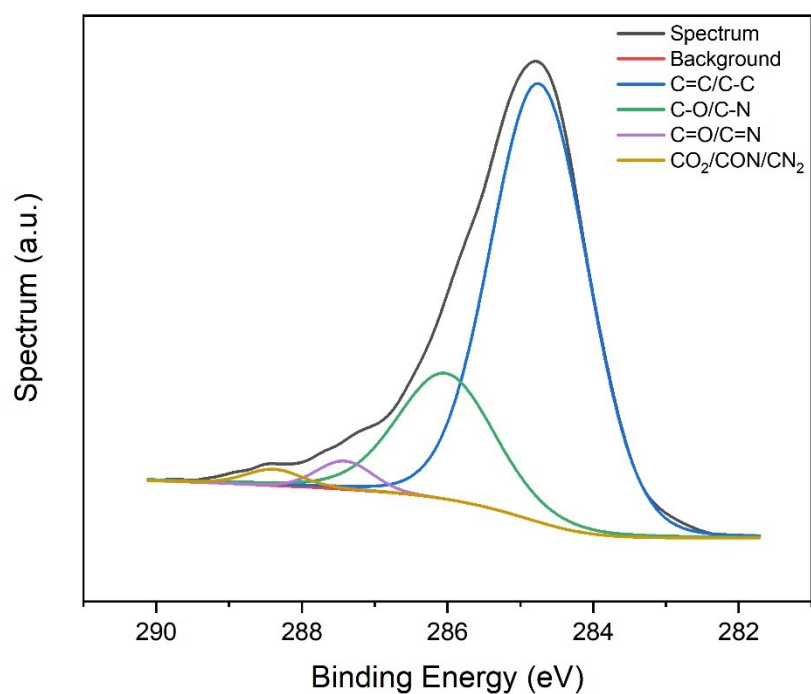

**Figure S15** C 1s region of XPS spectrum of **1-900**.

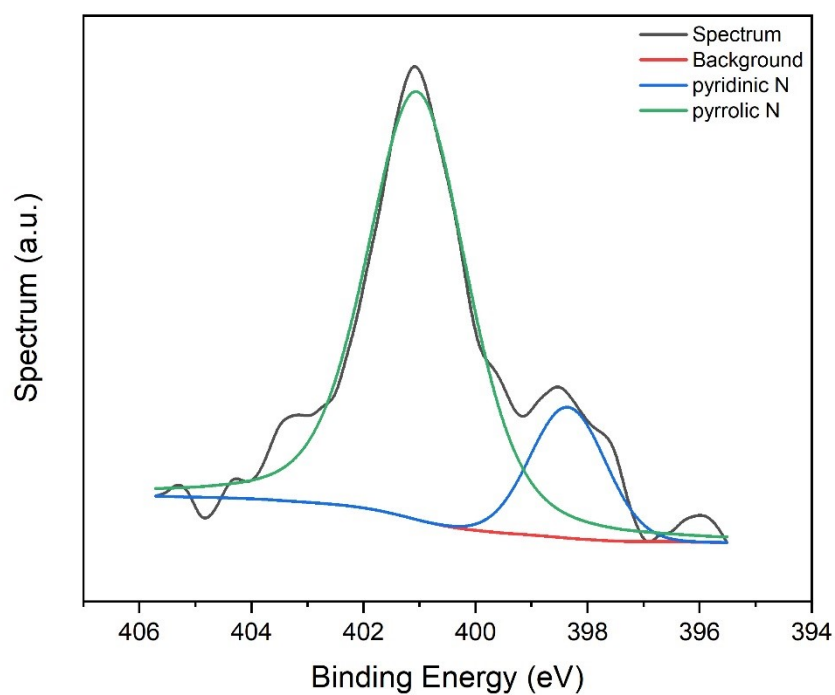

**Figure S16** N 1s region of XPS spectrum of **1-900**.

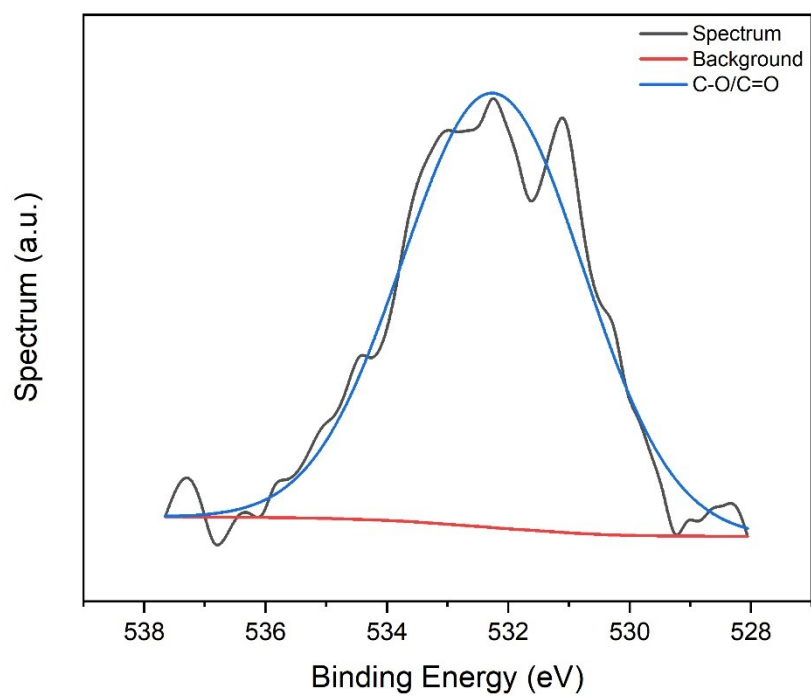

**Figure S17** O 1s region of XPS spectrum of **1-900**.

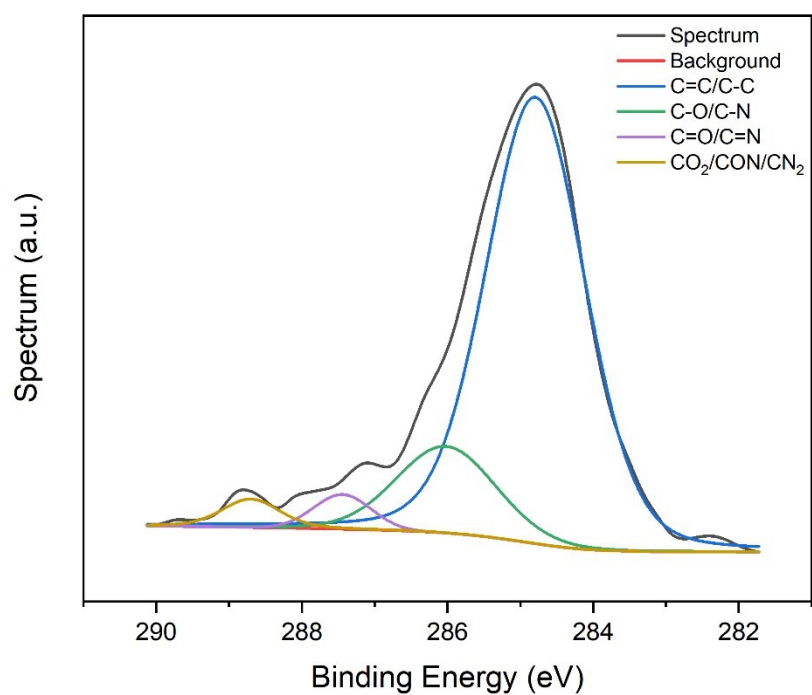

**Figure S18** C 1s region of XPS spectrum of **1-750**.

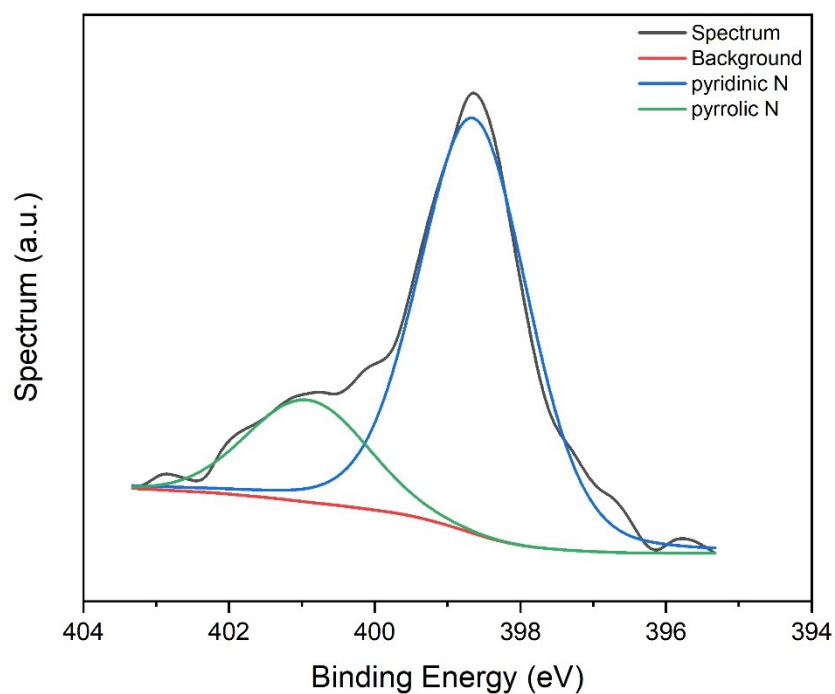

**Figure S19** N 1s region of XPS spectrum of **1-750**.

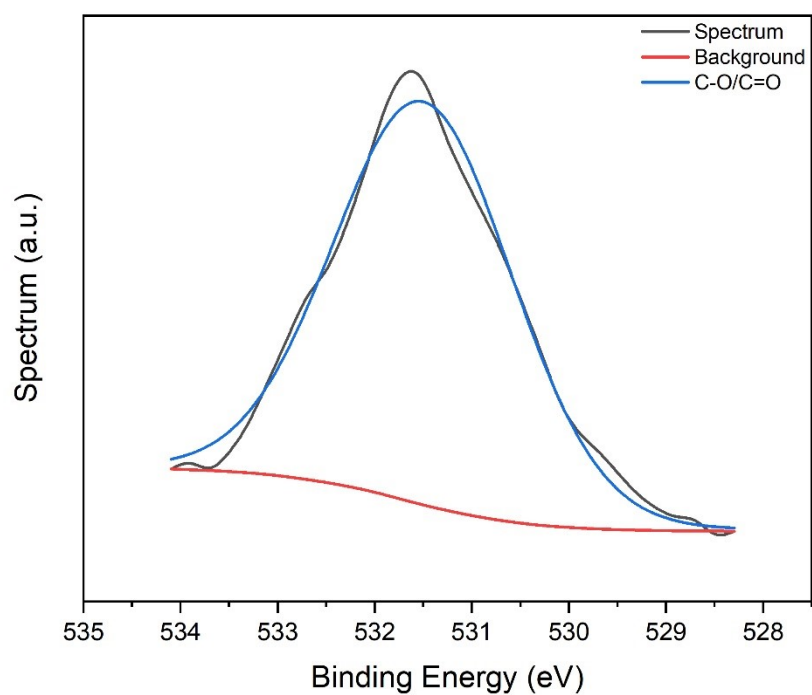

**Figure S20** O 1s region of XPS spectrum of **1-750**.

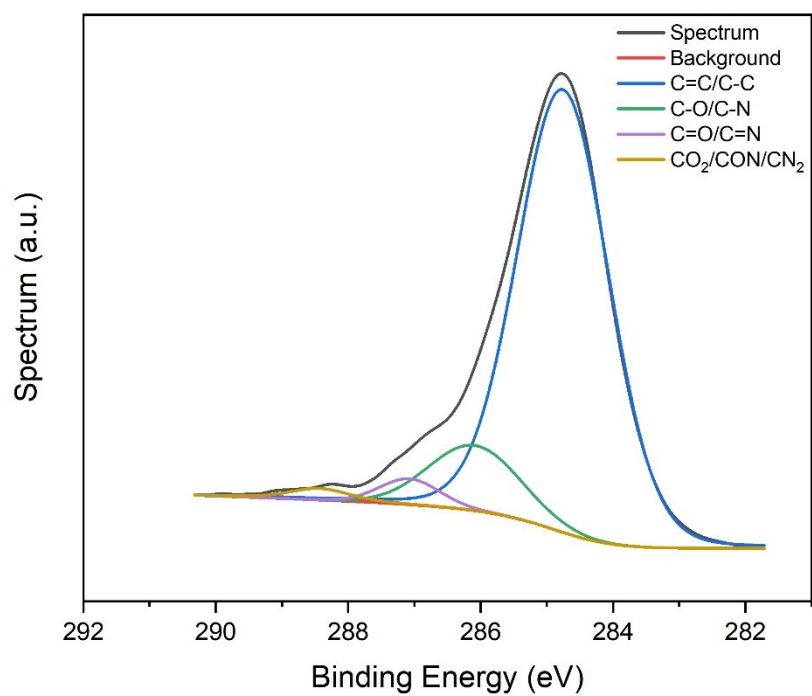

**Figure S21** C 1s region of XPS spectrum of **2-1050**.

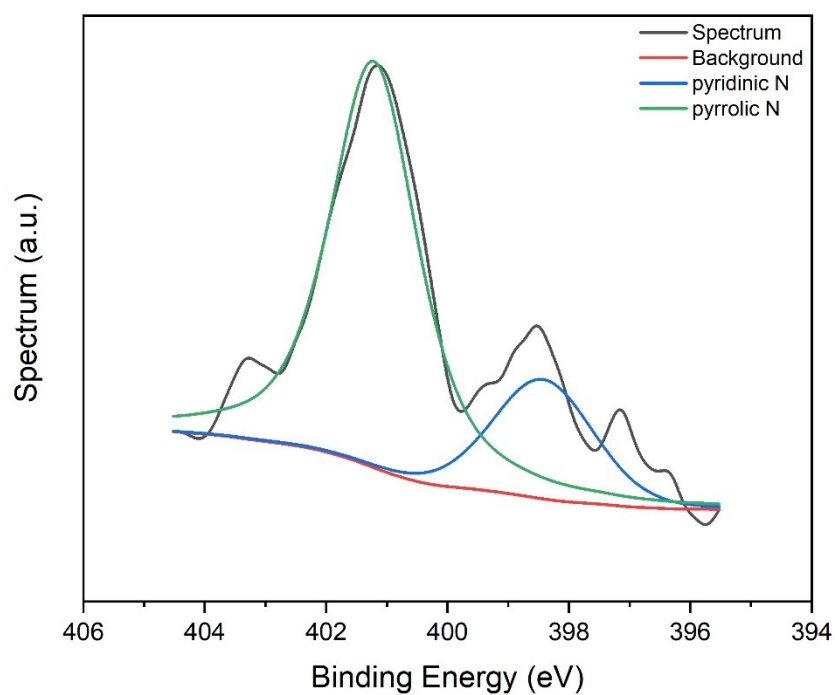

**Figure S22** N 1s region of XPS spectrum of **2-1050**.

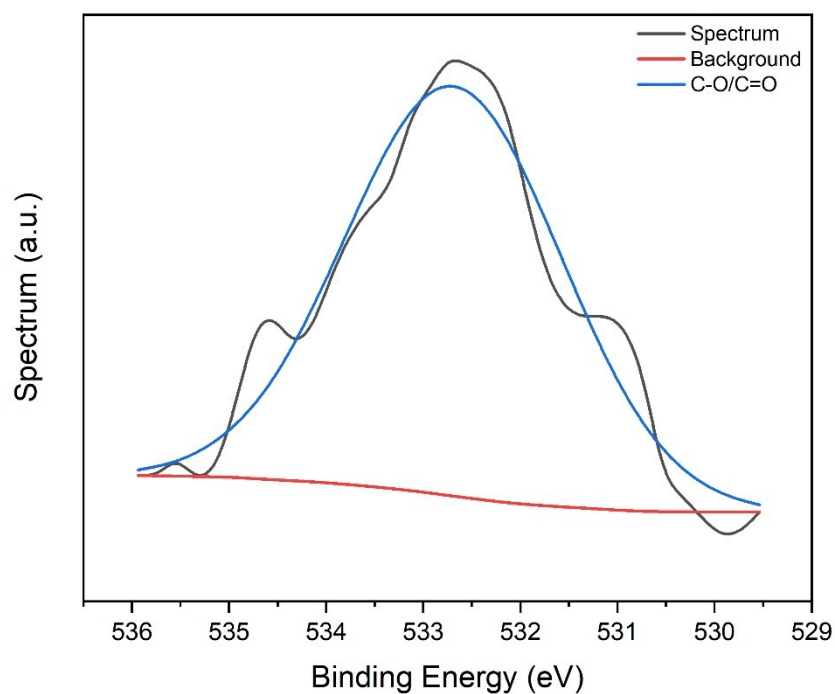

**Figure S23** O 1s region of XPS spectrum of **2-1050**.

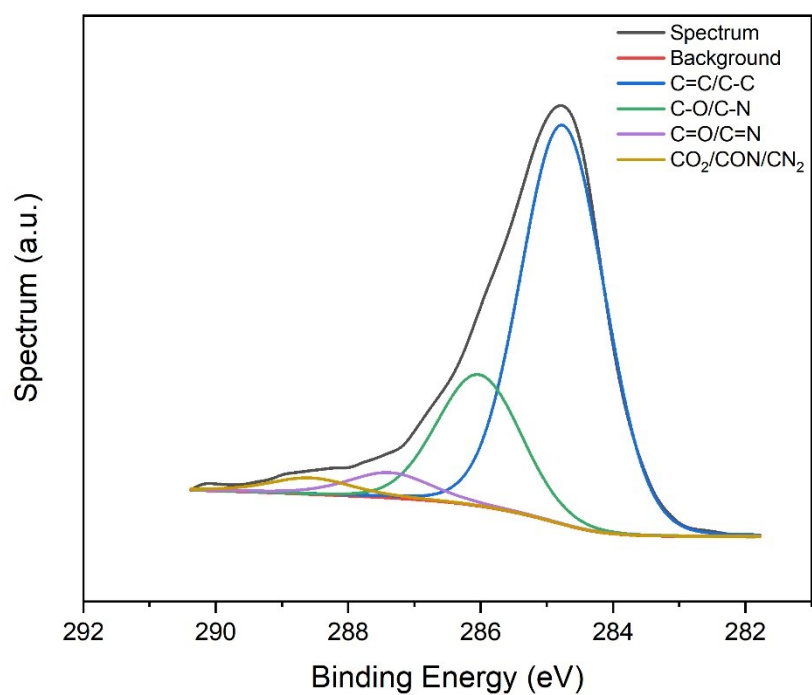

**Figure S24** C 1s region of XPS spectrum of **2-900**.

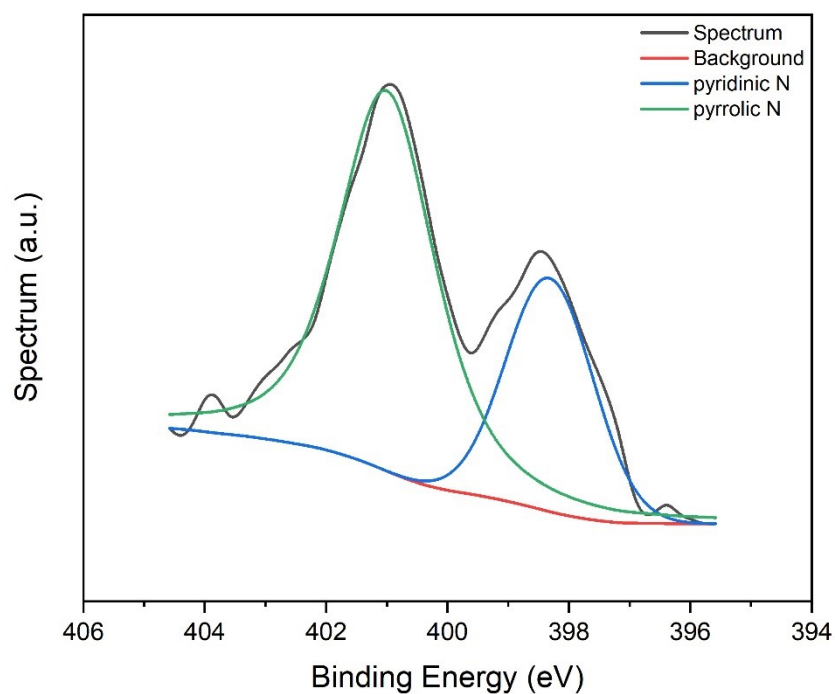

**Figure S25** N 1s region of XPS spectrum of **2-900**.

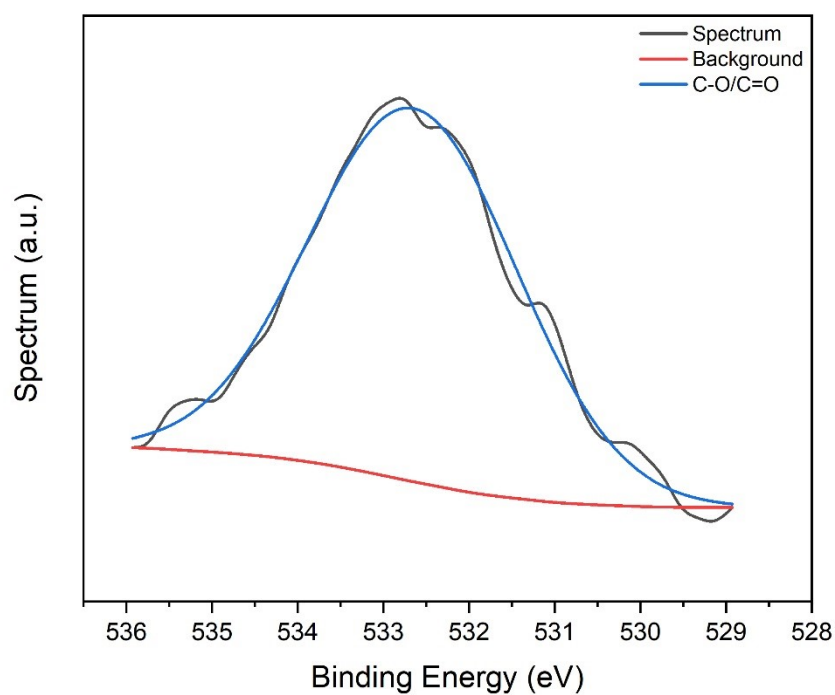

**Figure S26** O 1s region of XPS spectrum of **2-900**.

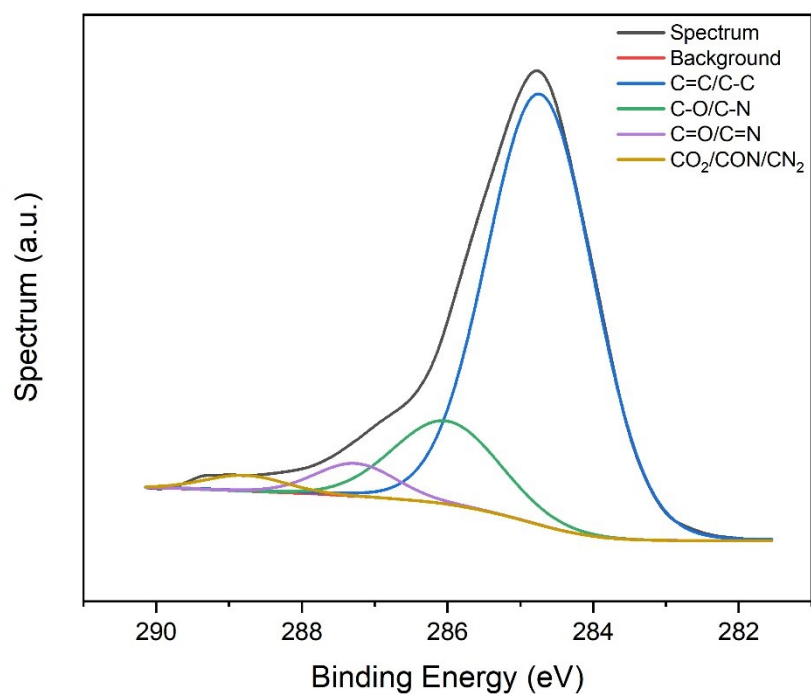

**Figure S27** C 1s region of XPS spectrum of **2-750**.

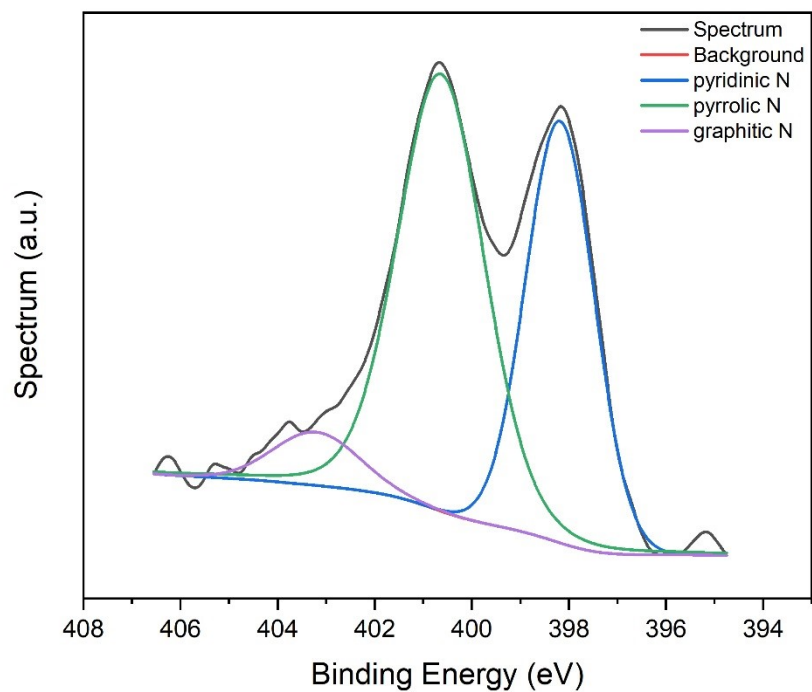

**Figure S28** N 1s region of XPS spectrum of **2-750**.

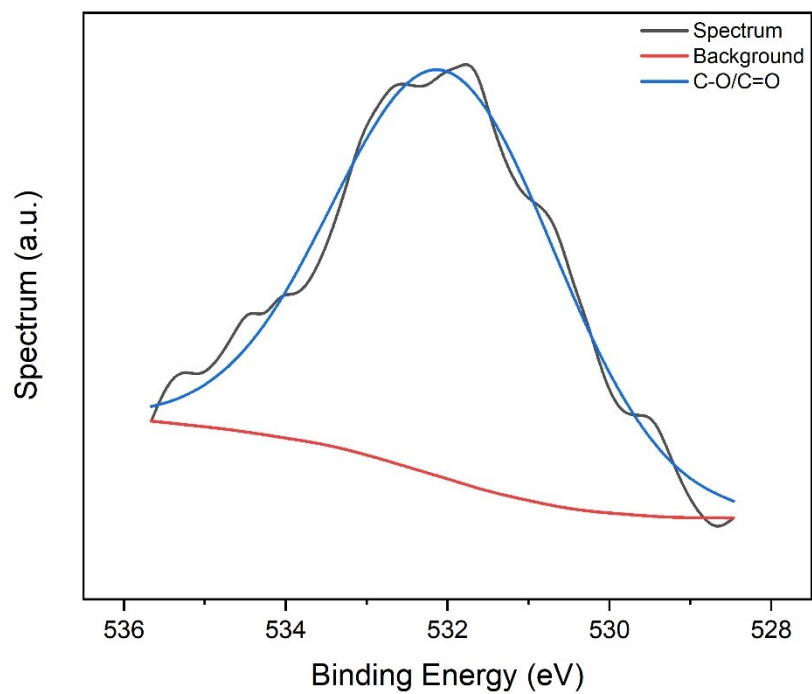

**Figure S29** O 1s region of XPS spectrum of **2-750**.

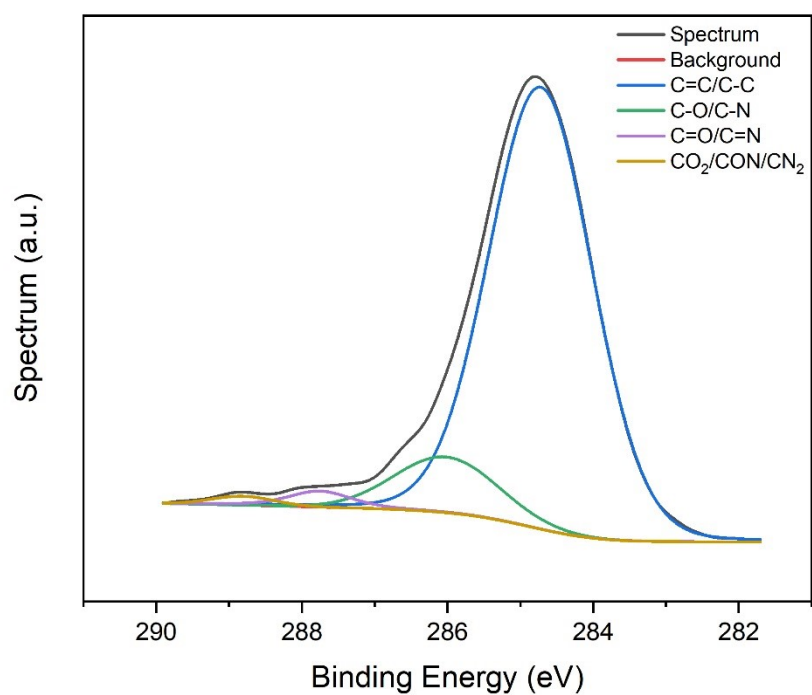

**Figure S30** C 1s region of XPS spectrum of **2-600**.

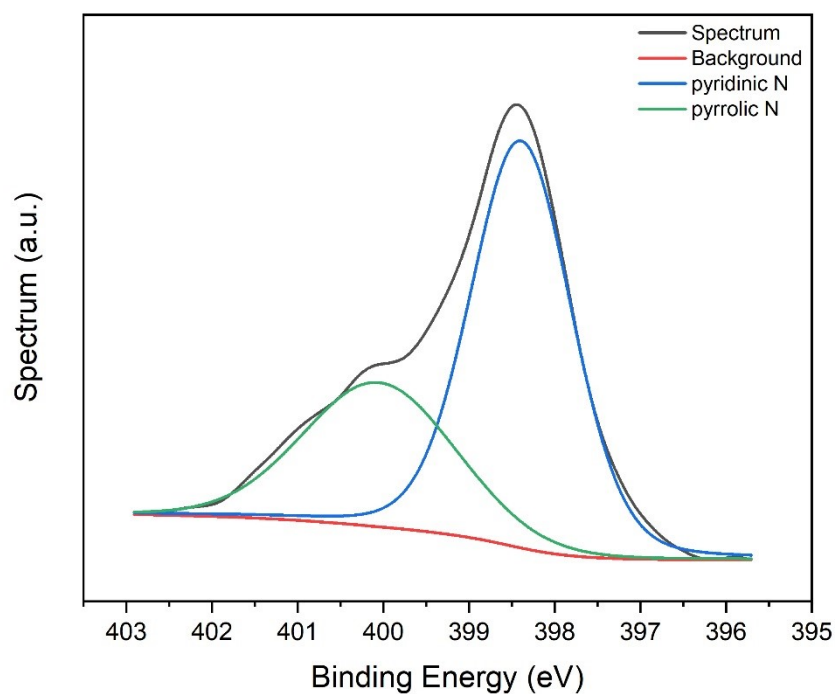

**Figure S31** N 1s region of XPS spectrum of **2-600**.

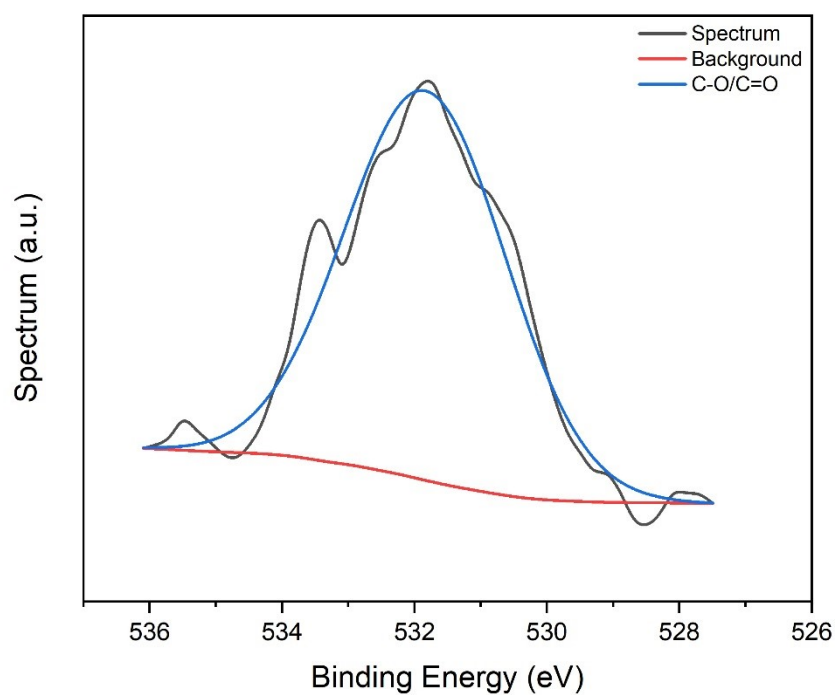

**Figure S32** O 1s region of XPS spectrum of **2-600**.

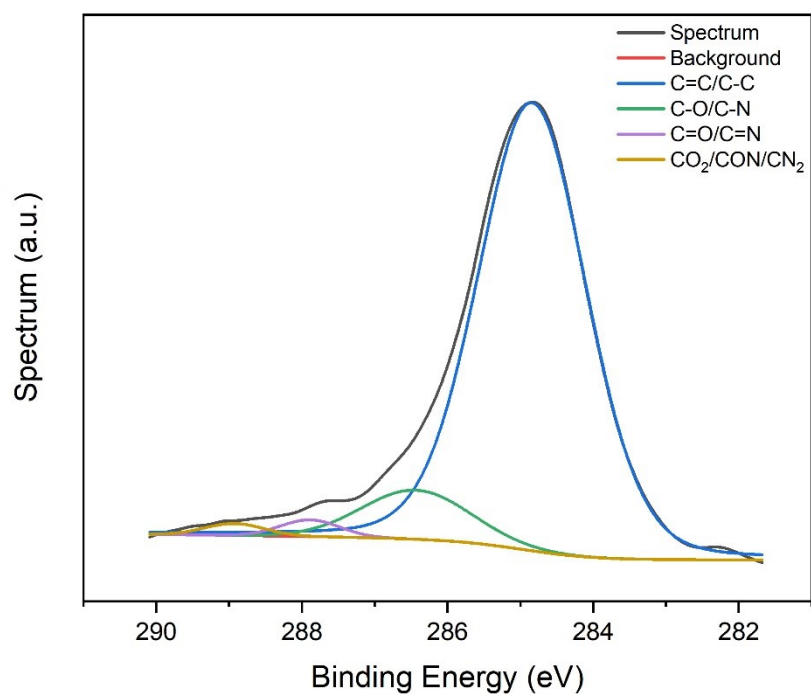

**Figure S33** C 1s region of XPS spectrum of **2-500**.

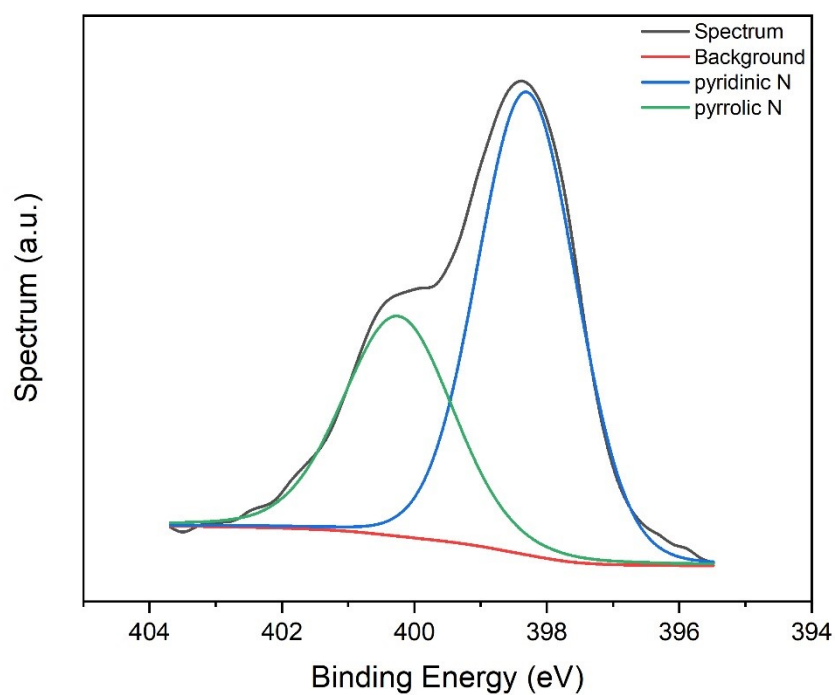

**Figure S34** N 1s region of XPS spectrum of **2-500**.

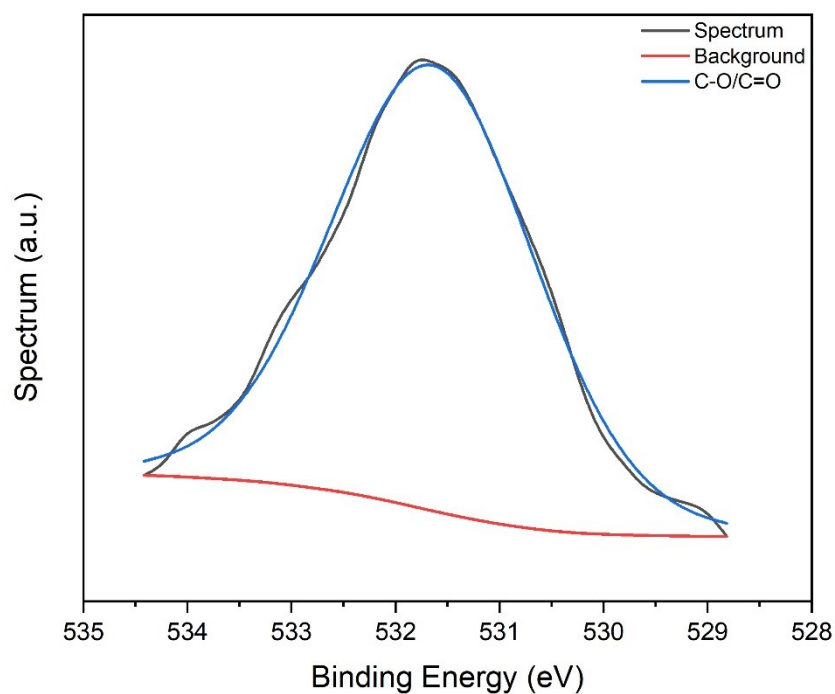

**Figure S35** O 1s region of XPS spectrum of **2-500**.

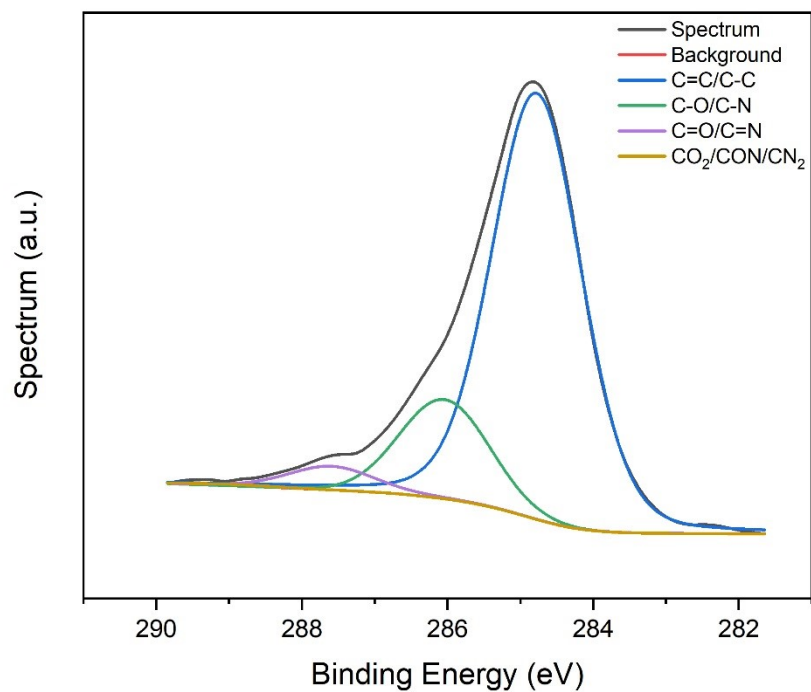

**Figure 36** C 1s region of XPS spectrum of **3-1050**.

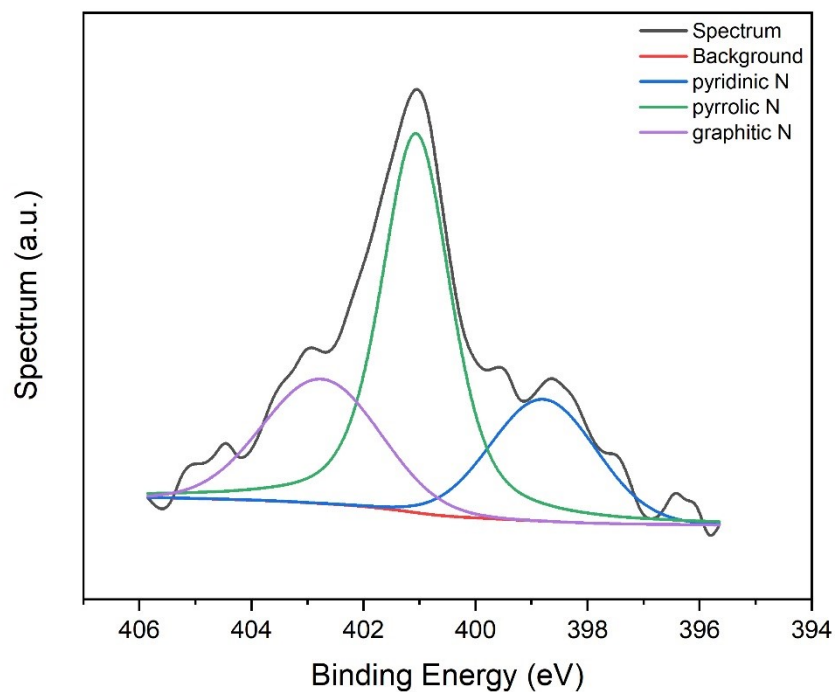

**Figure S37** N 1s region of XPS spectrum of **3-1050**.

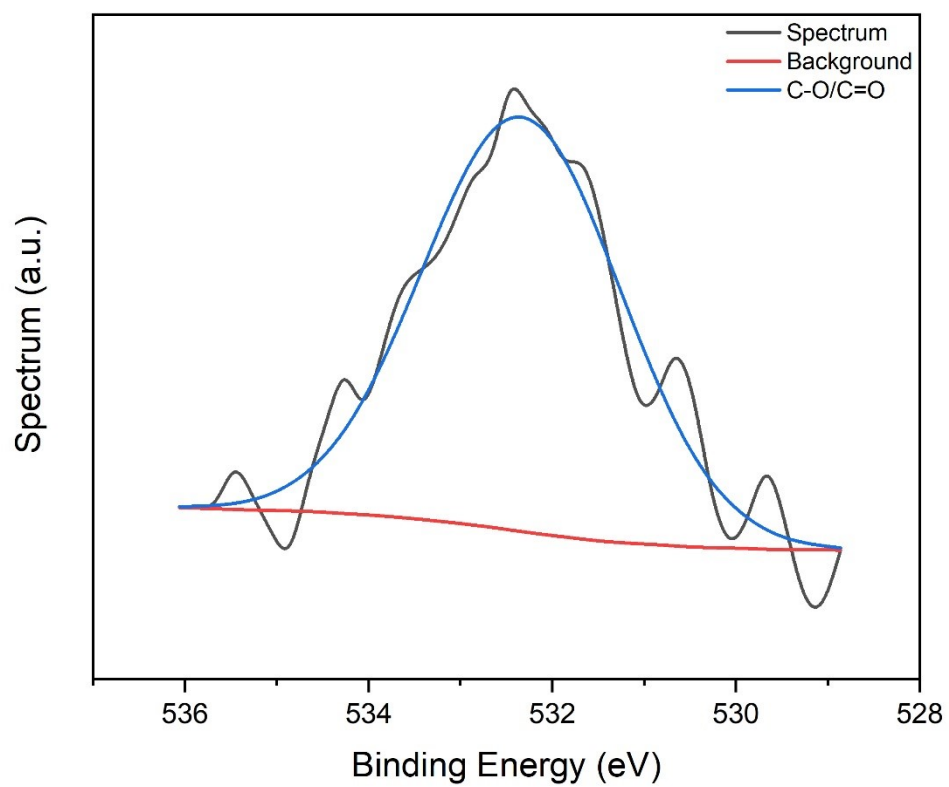

**Figure S38** O 1s region of XPS spectrum of **3-1050**.

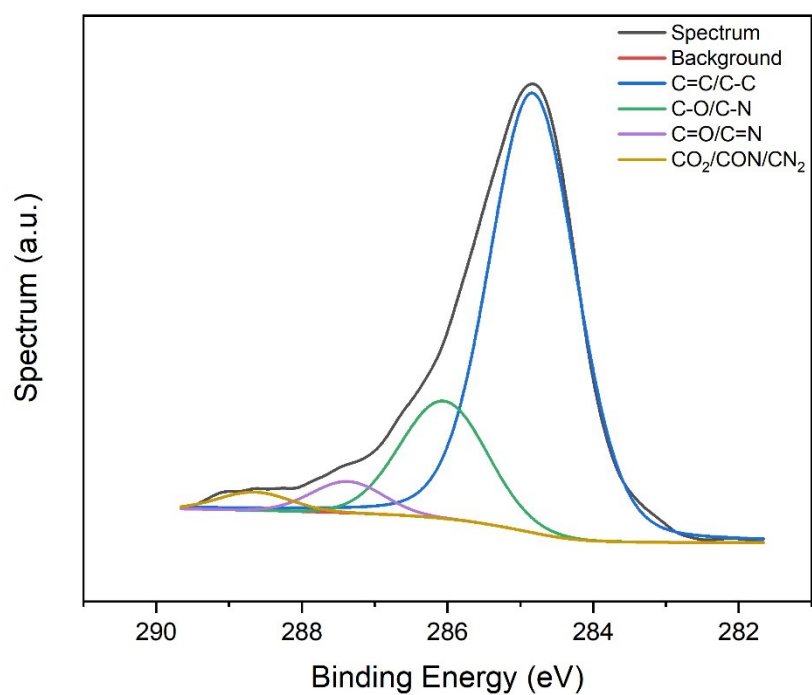

**Figure S39** C 1s region of XPS spectrum of **3-900**.

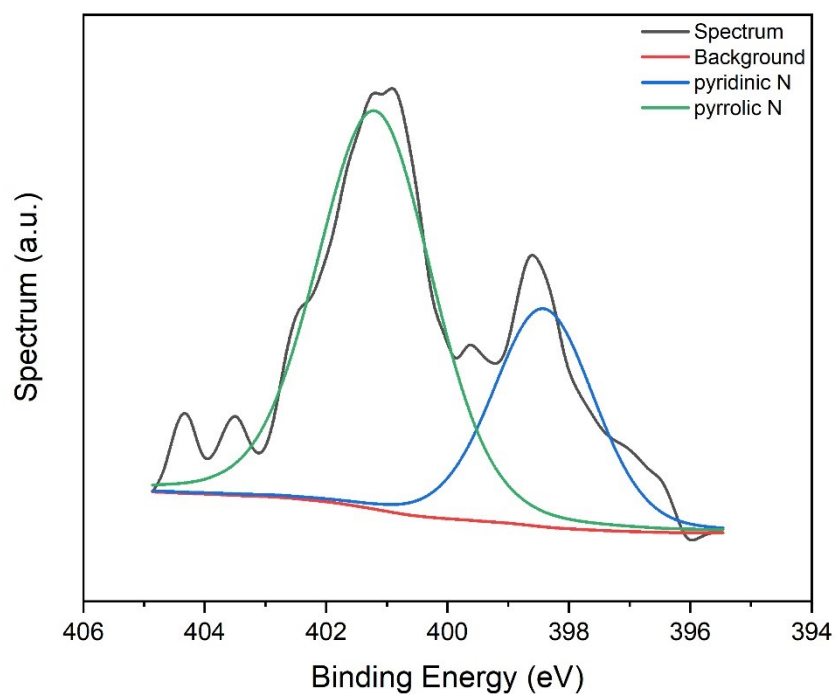

**Figure S40** N 1s region of XPS spectrum of **3-900**.

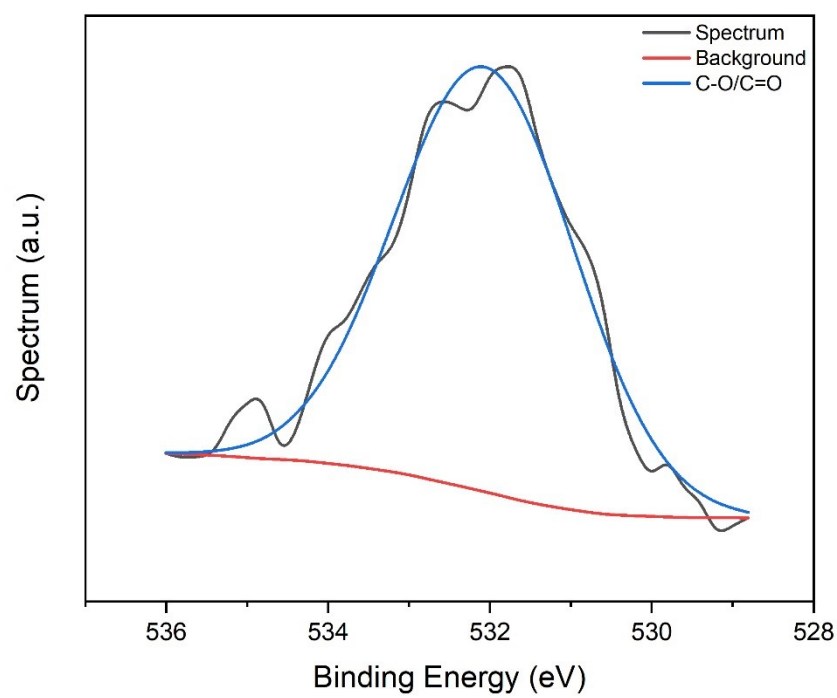

**Figure S41** O 1s region of XPS spectrum of **3-900**.

#### 4. AFM images

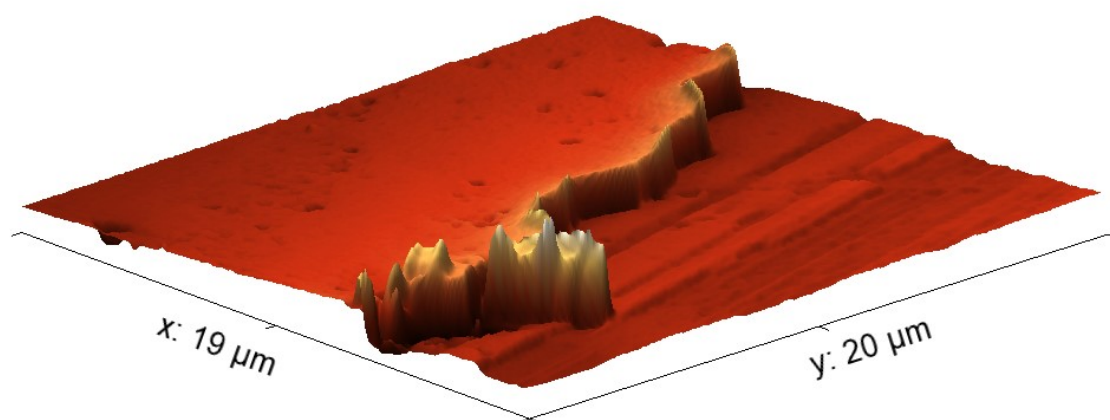

**Figure S42** AFM landscape of **1-1050**.

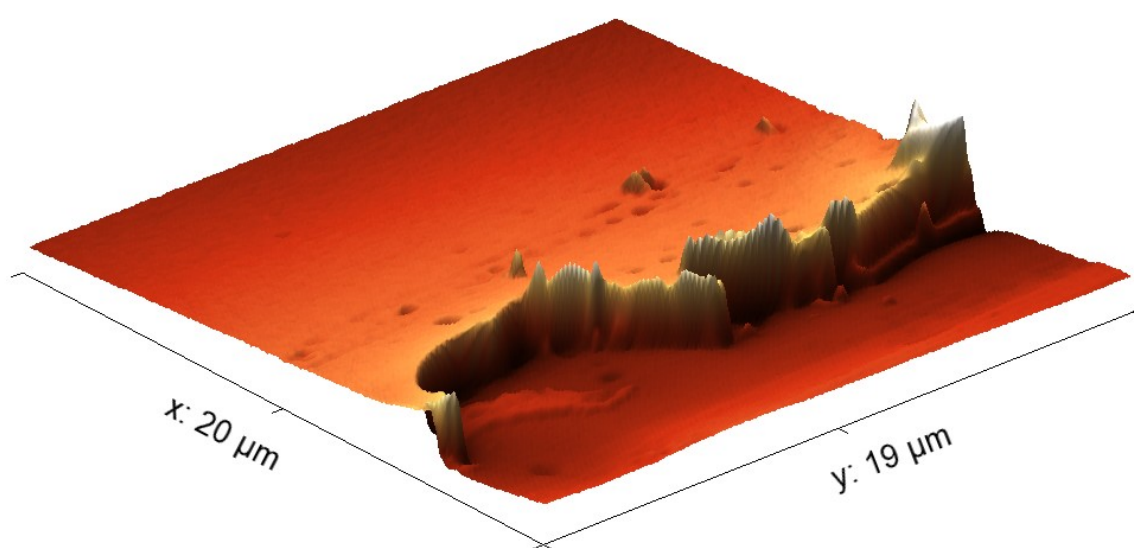

**Figure S43** AFM landscape of **2-900**.

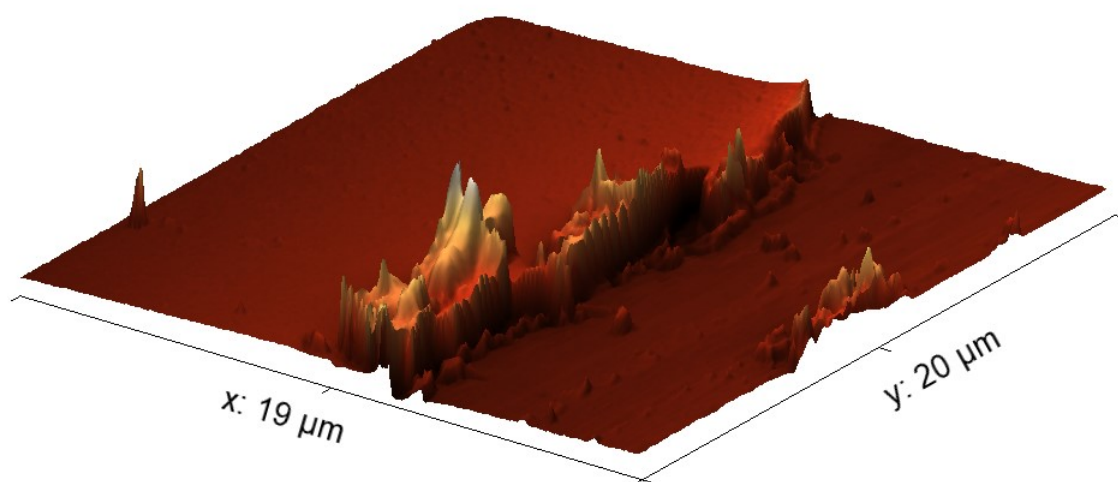

**Figure 44** AFM landscape of **3-1050**.

## 5. STEM images

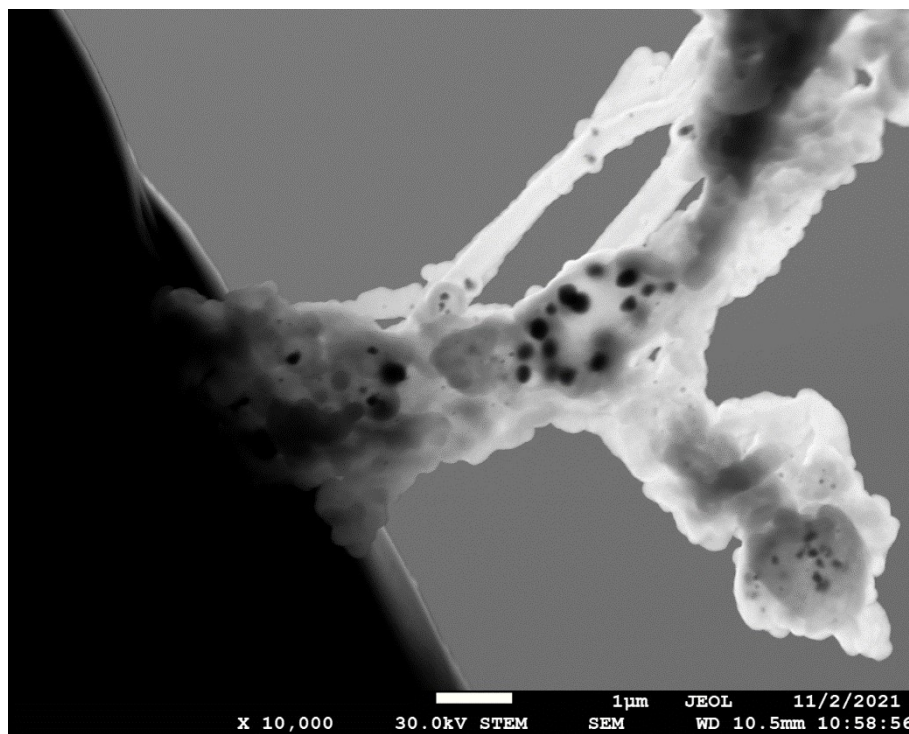

**Figure S45** „Macroscopic“ detail of nano-mousse fotation in 1-1050a.

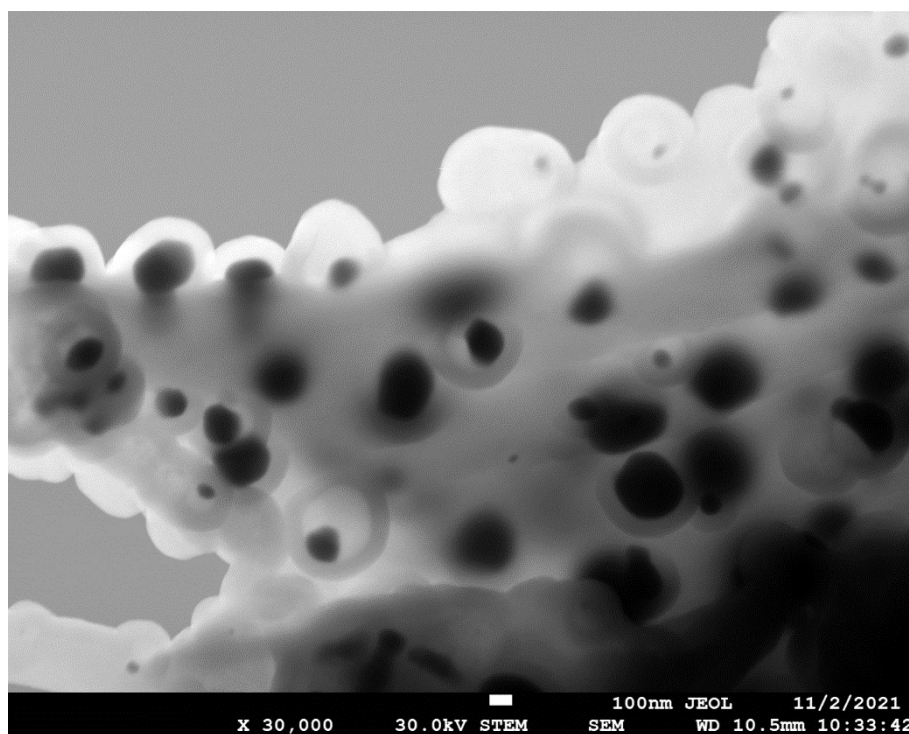

**Figure S46** System of interconnected multi-layer carbon spheres in 1-1050a.

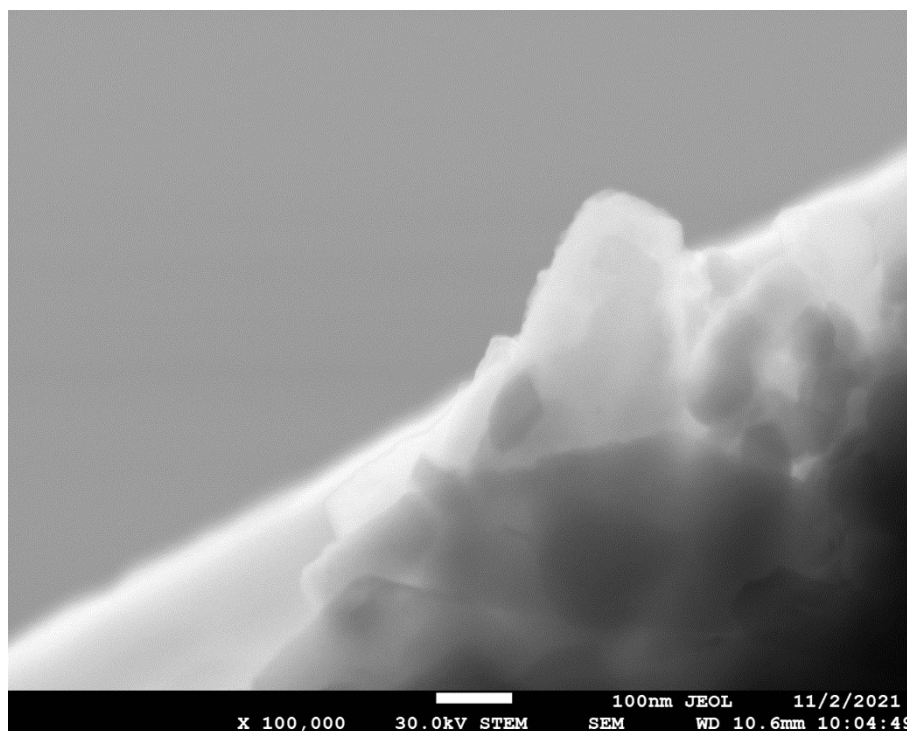

**Figure S47** Attempted STEM high-resoluiton detail of the surface of nano-spheres in **1-1050a**.

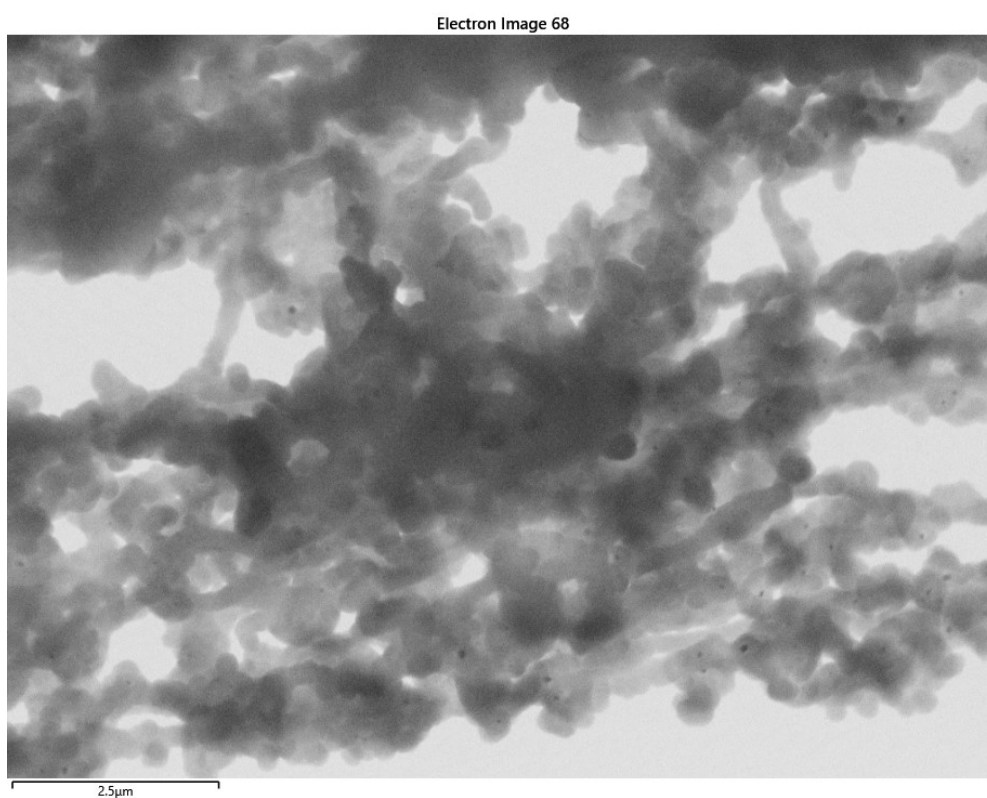

**Figure S48** Web of nano-mousse found in **2-900a**.

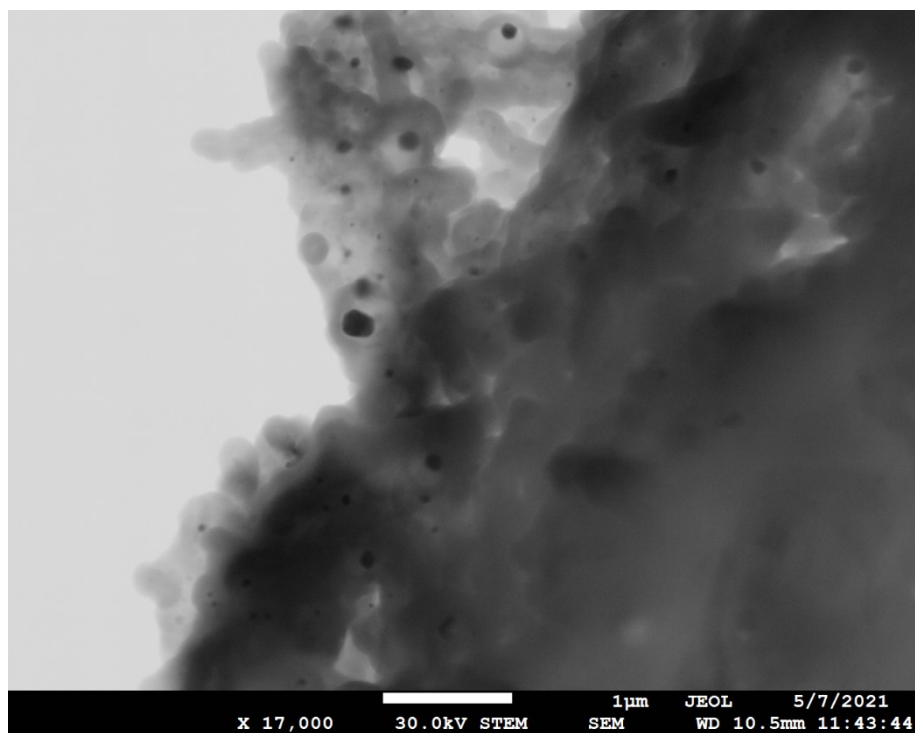

**Figure S49** Detail of the web of nano-mousse found in **2-900a**.

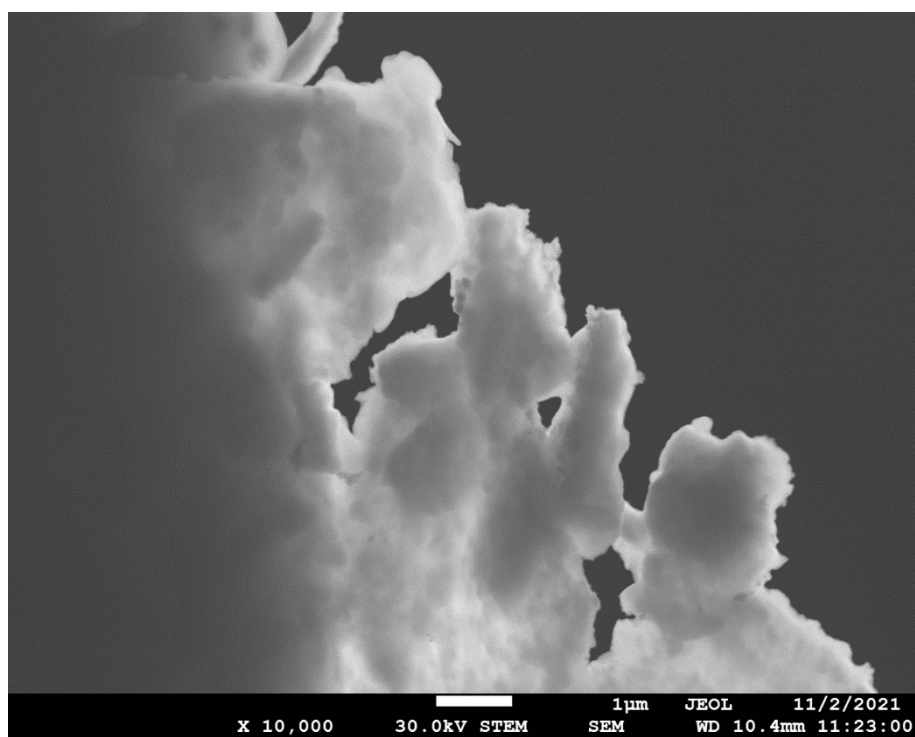

**Figure 50** Formations of nano-mousse in **3-1050a** in lower resolution.

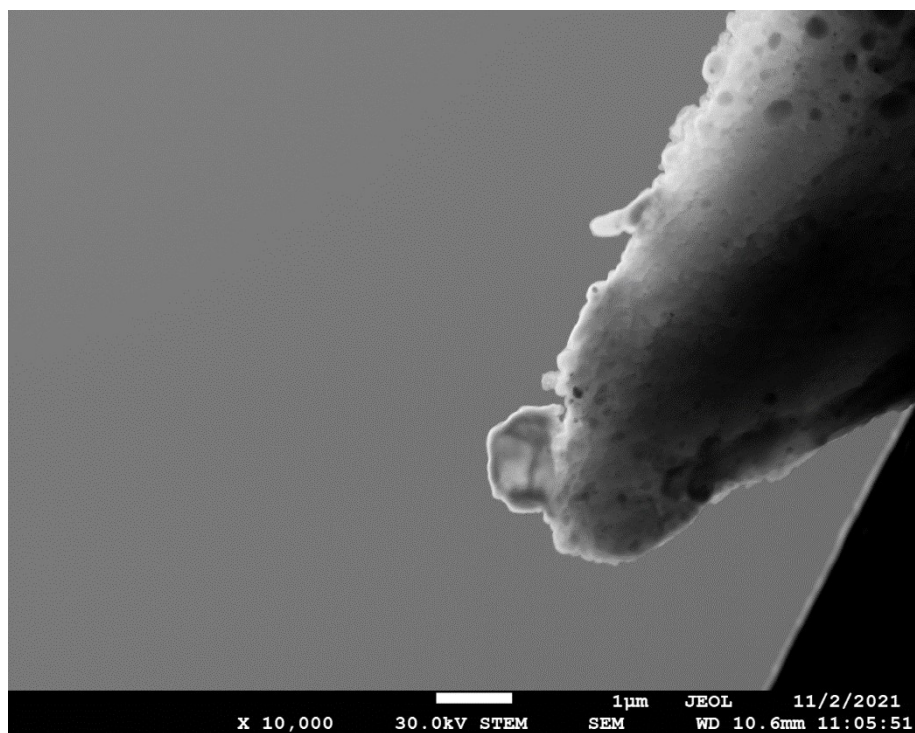

**Figure S51** Detail of nano-mousse formation in **3-1050a**.

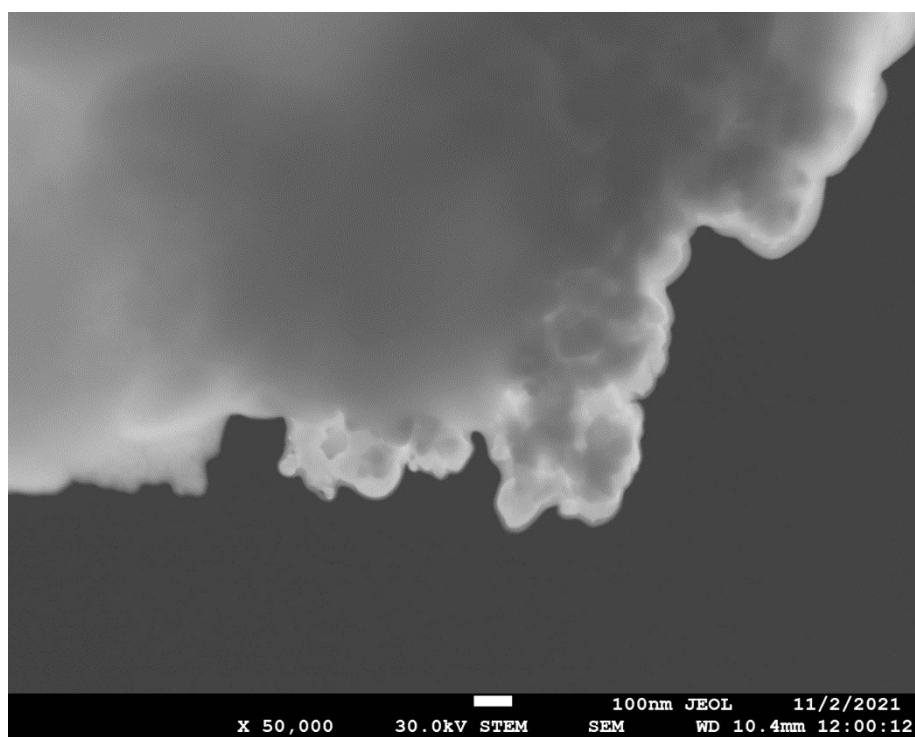

**Figure S52** Attempted high-resolution detail of nano-mousse **3-1050a** on the edge of a formation (nano-mousse character still visible).

6. HR-TEM proceedings

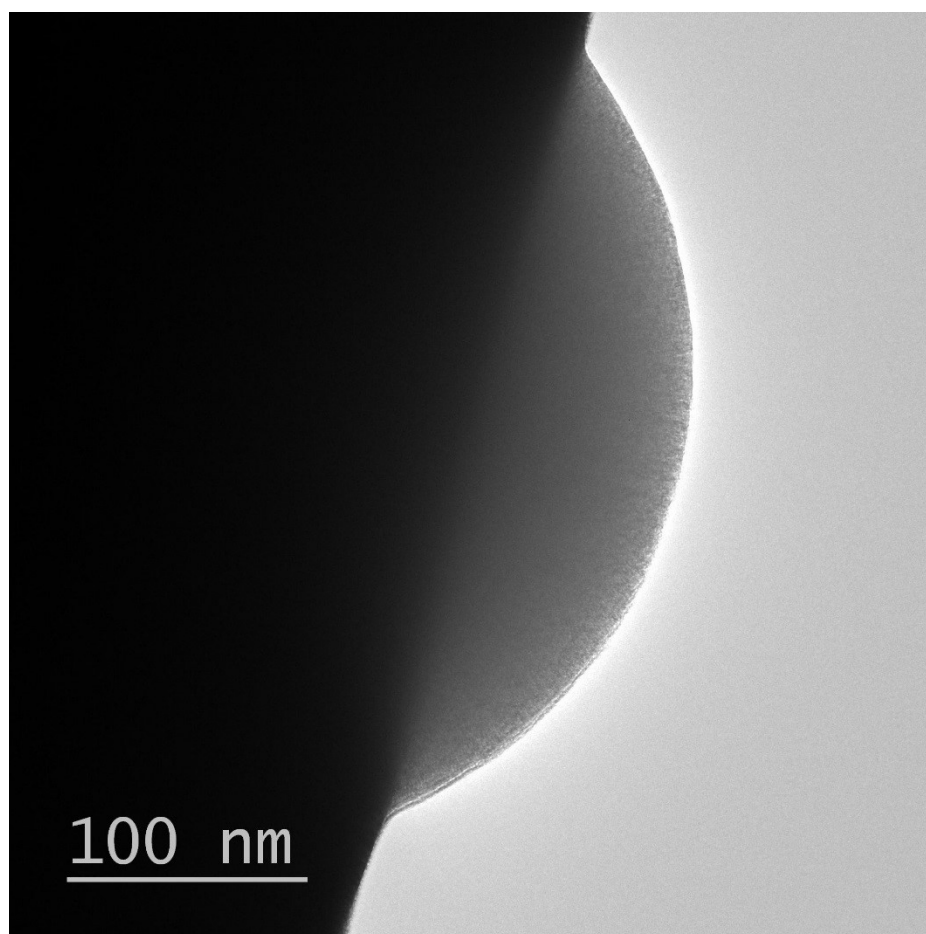

**Figure S53** Part of an individual sphere found in **1-1050a**.

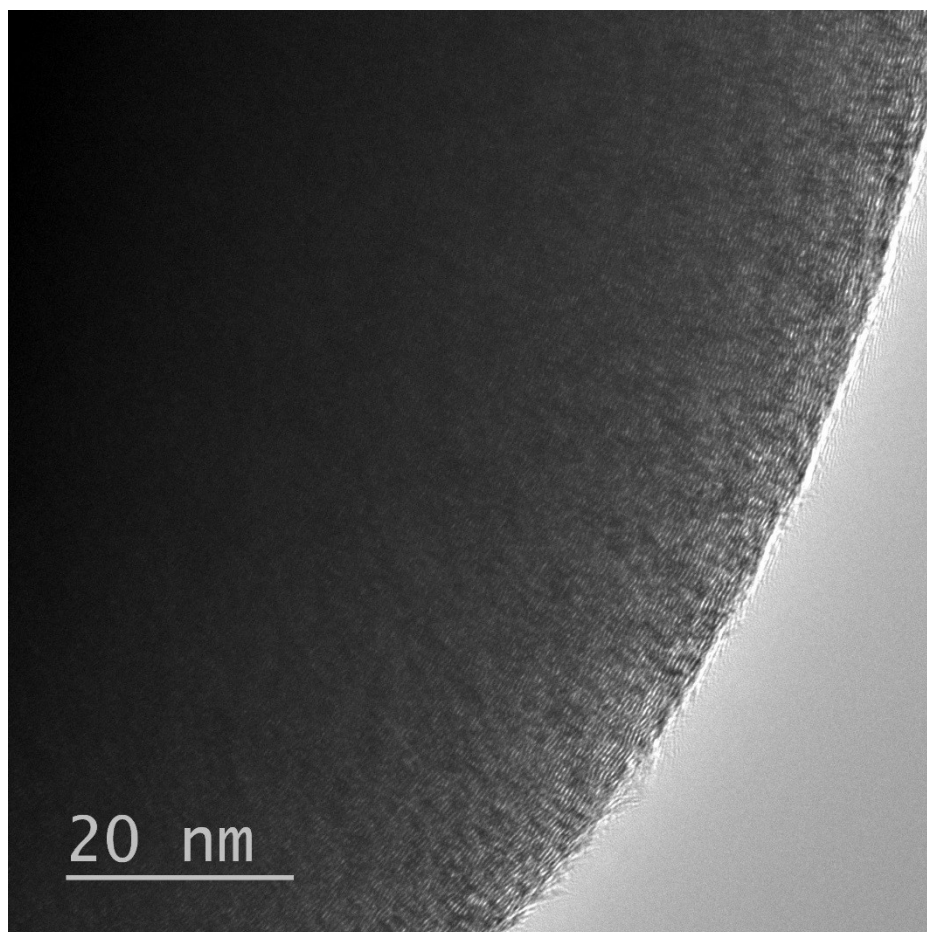

**Figure S54** Multiwall character of **1-1050a**.

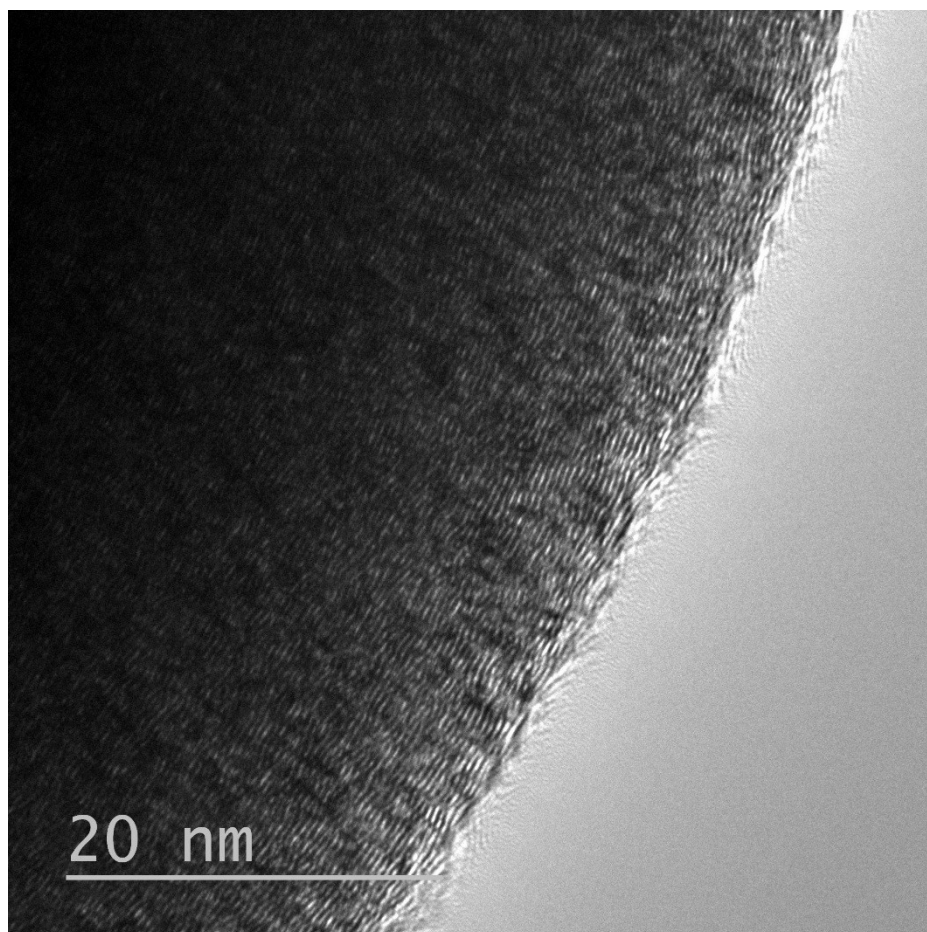

**Figure S55** Stacked rounded multi-wall carbon honeycombs on the surface of a sphere in **1-1050a**.

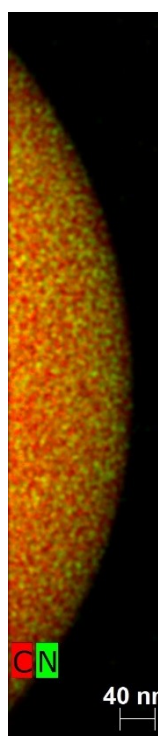

**Figure S56** EDS map of **1-1050a** individual sphere.

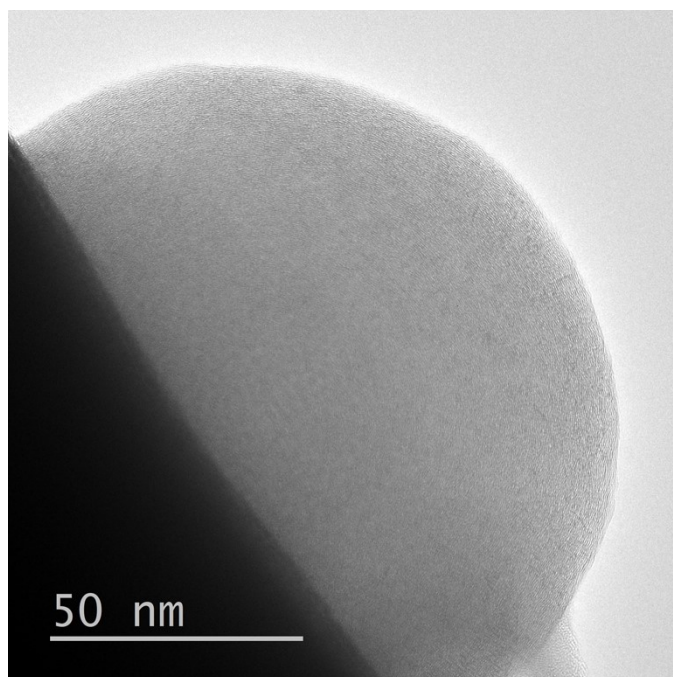

**Figure S57** Individual sphere of **2-1050a**.

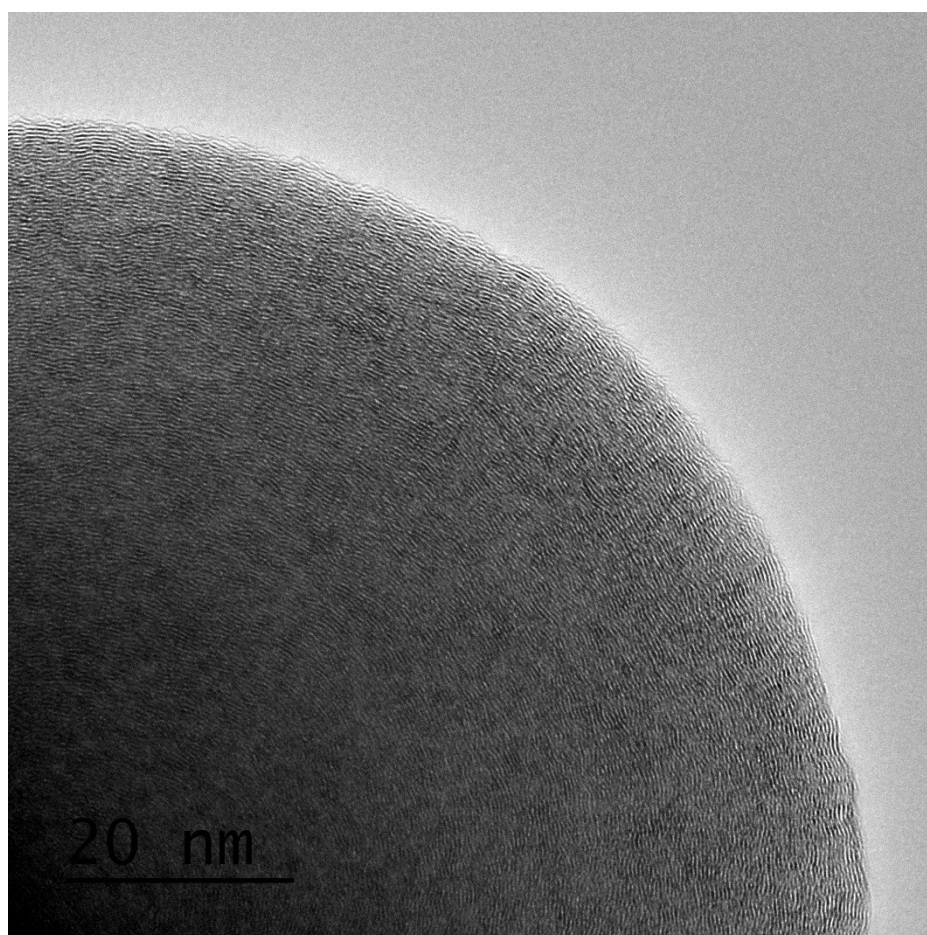

**Figure S58** Multi-wall character of an individual sphere in **2-1050a**.

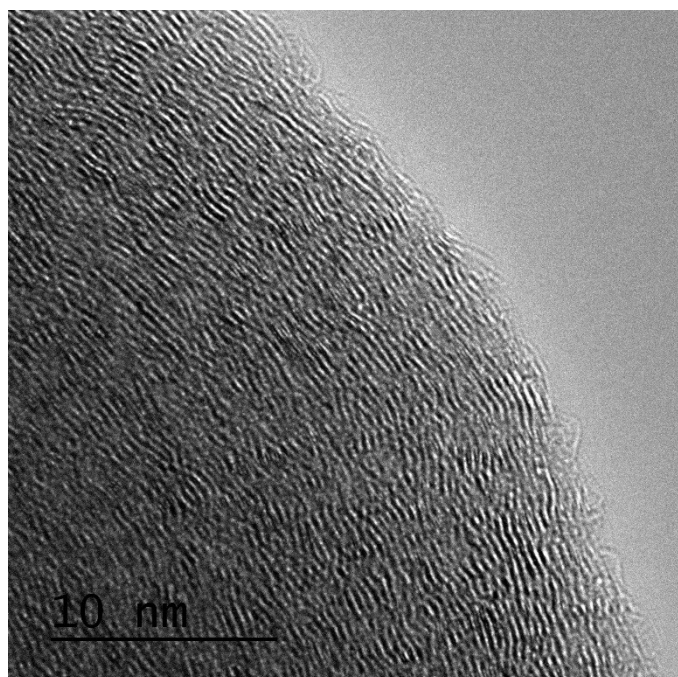

**Figure S59** Detail of multi-wall character of an individual sphere in **2-1050a**.

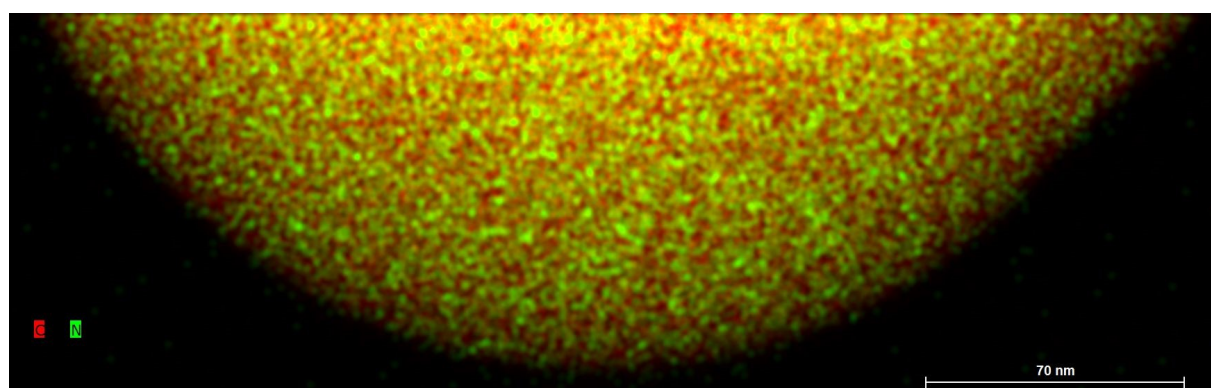

**Figure S60** C/N EDS map of an individual sphere in **2-1050a**.

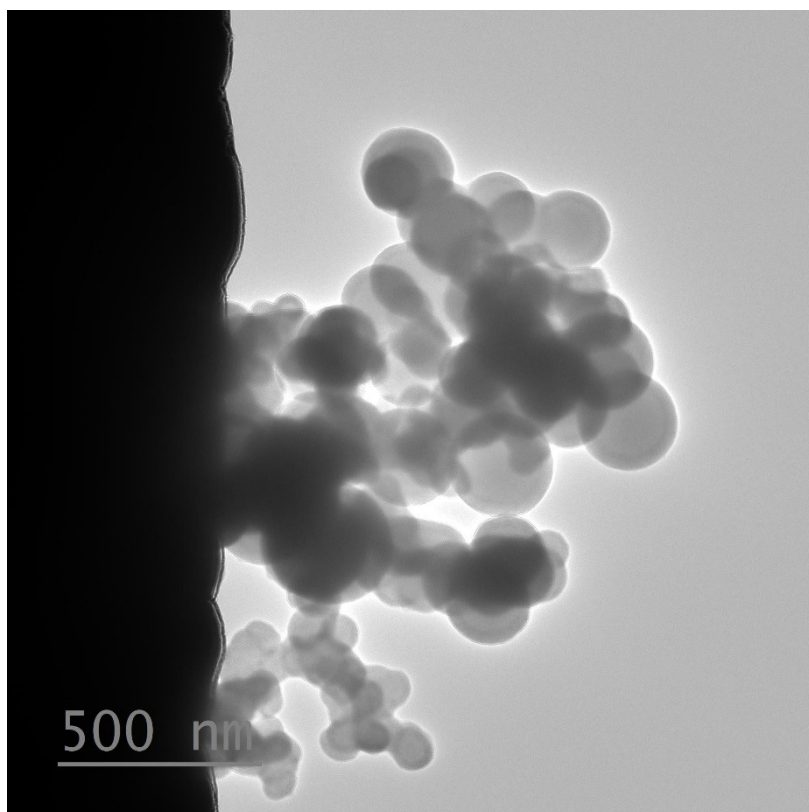

**Figure S61** Nano-mousse nanoformation in **2-500a**.

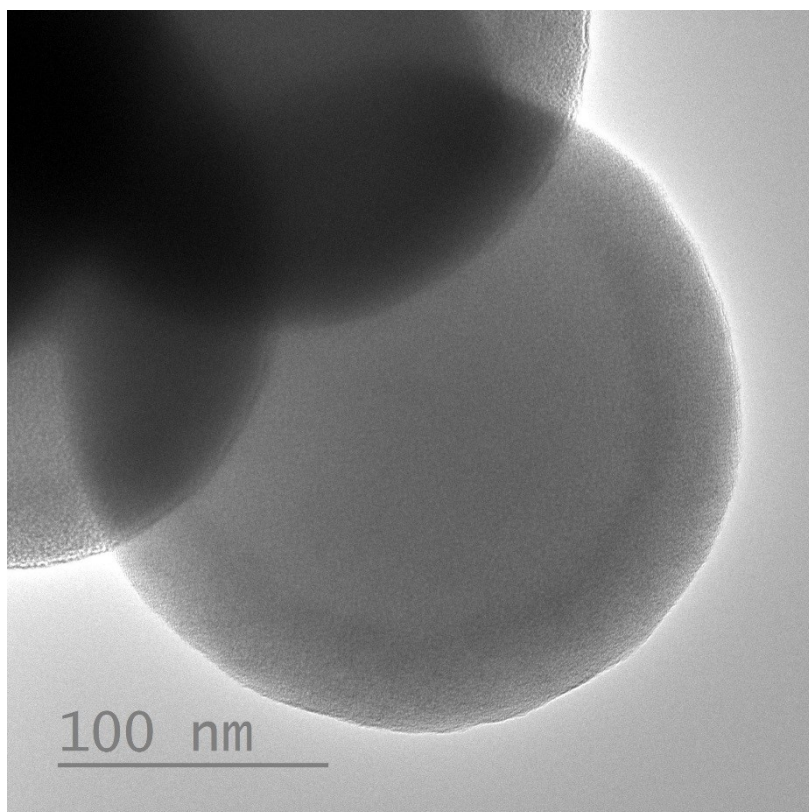

**Figure S62** Individual sphere in **2-500a**, the multi-wall nanosphere character quite visible here.

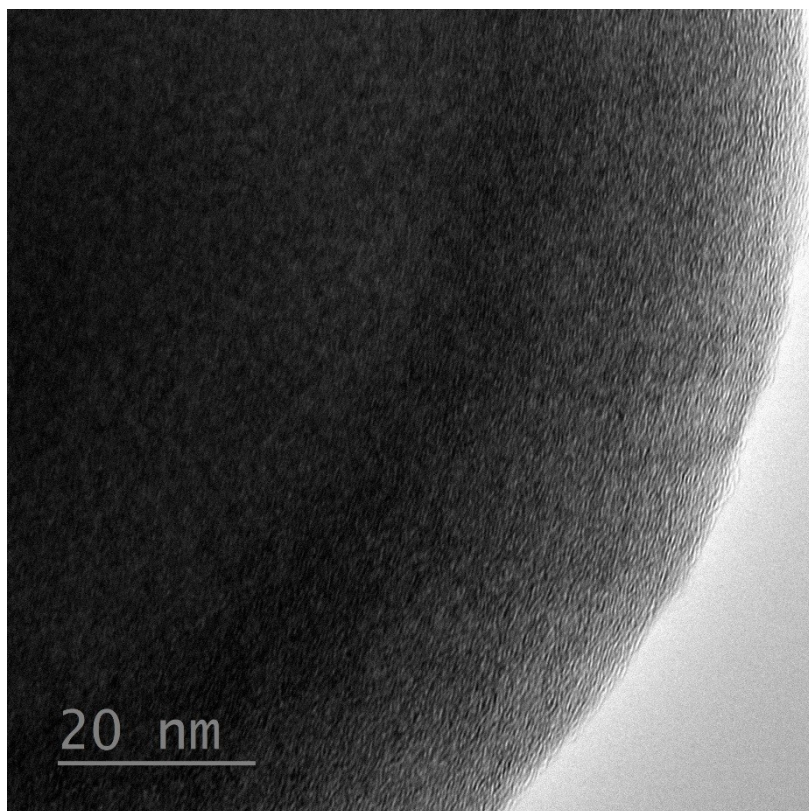

**Figure S63** Detail of surface of nano-mousse sphere of **2-500a**.

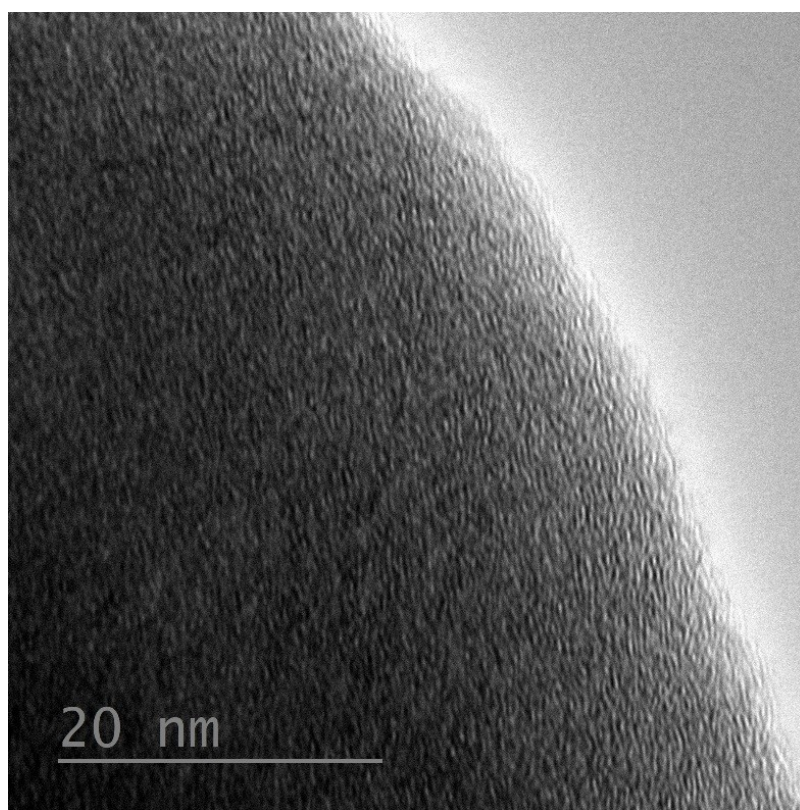

**Figure S64** Multi-wall character of **2-500a**.

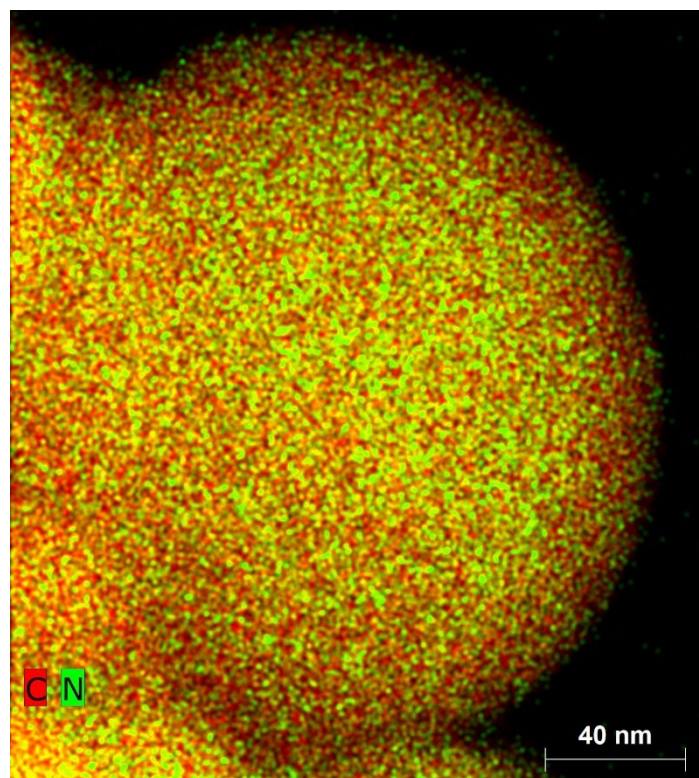

**Figure S65** C/N EDS map of **2-500a**.

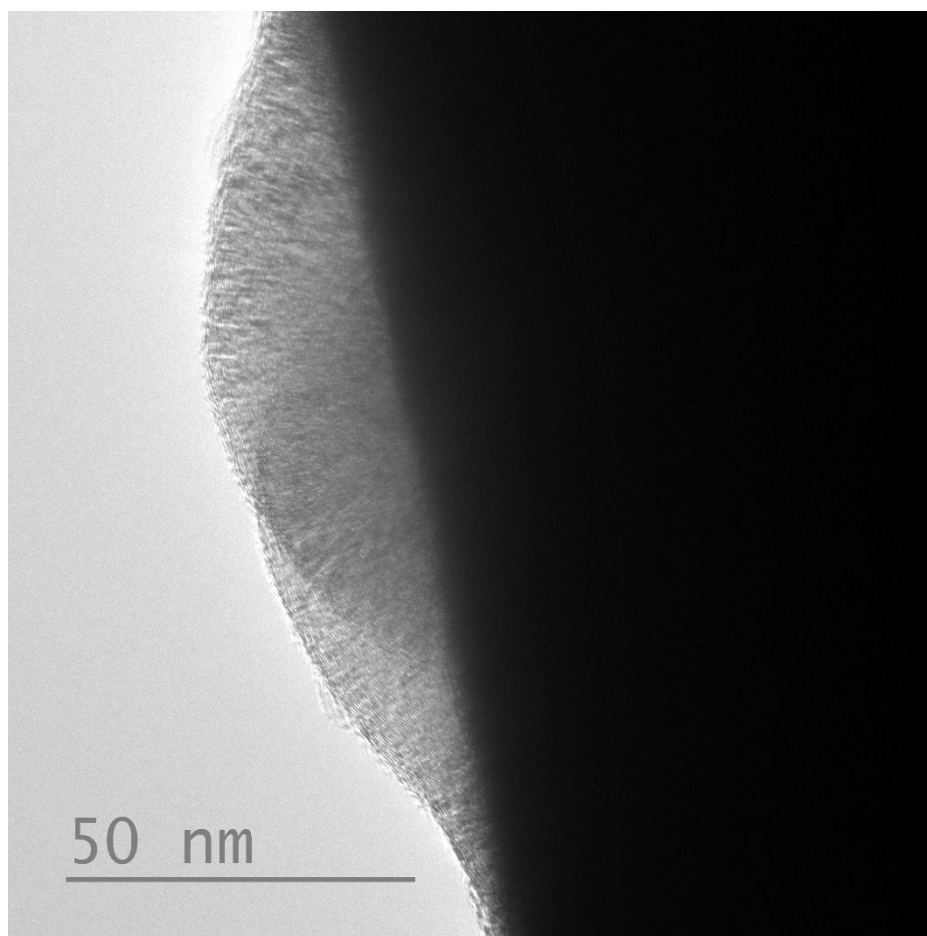

**Figure S66** Overlapping formation of spheres in **3-1050a**.

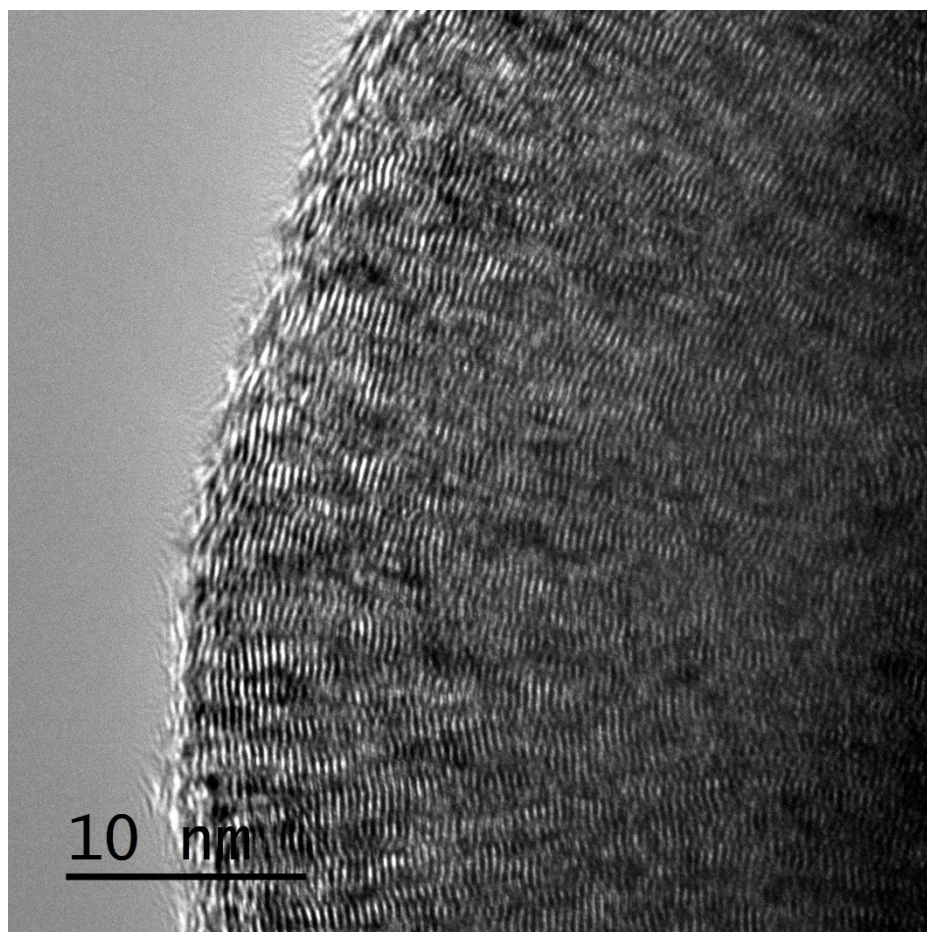

**Figure S67** Stacked carbon layers on the surface of **3-1050a**.

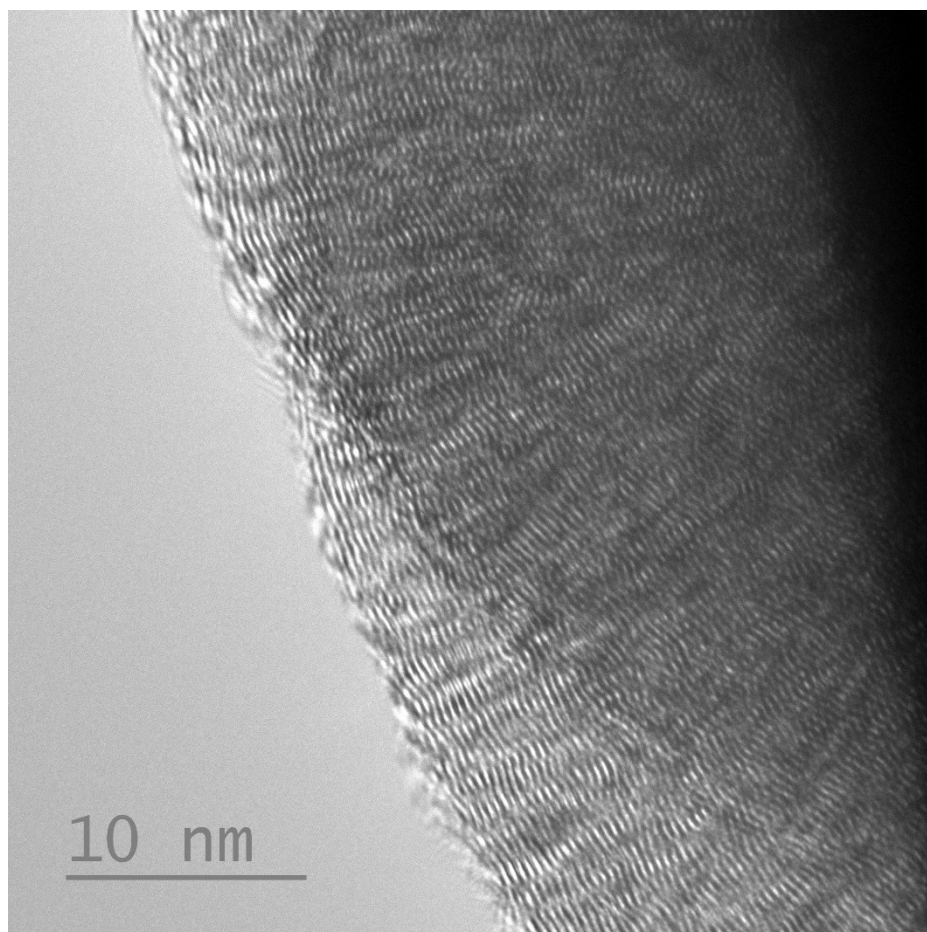

**Figure S68** High-resolution detail of connection of two overlapping spheres in **3-1050a**.

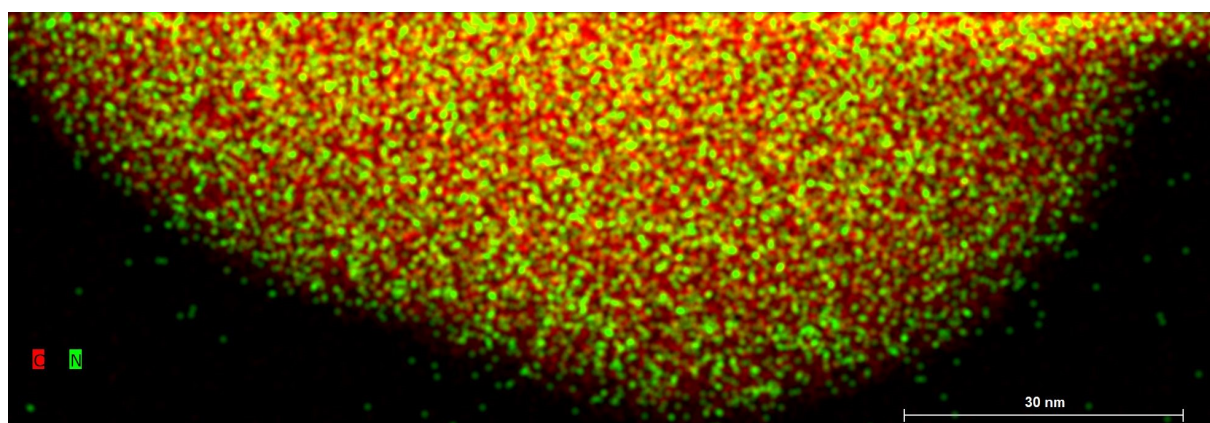

**Figure S69** C/N EDS map of spherical formations in **3-1050a**.
